# Supplementary material for: Gamma rhythms and visual information in mouse V1 specifically modulated by somatostatin+ neurons in reticular thalamus
Source: eLife. 2021 Apr 12;10:e61437. doi: 10.7554/eLife.61437 (PMC8064751; doi:10.7554/eLife.61437)
Supplement: Source data 1. [file elife-61437-data1.xlsx]

## Sheet: Fig.2C
Fig. 2C-SOM with ChR2-V1 recording-no stimulus
	theta				beta				gamma
	laser off	laser on			laser off	laser on			laser off	laser on
	744.436	518.9			1281.6	992.394			2456.58	1946.1
	1675.25	995.895			2824.5	1711.04			5503.34	3084.44
	11167.4	5426.64			18413.3	8005.3			37905.8	12845.3
	44708.8	22544.4			72851	31015.1			169525	51080.4
	40379.5	25621.5			58039.8	31680.6			135410	53301.6
	37197.5	30065.3			54611.8	34437.5			117101	57933
	38516.4	33364.9			63553	38780.8			128283	65516.9
	43703.5	34746.5			73690	45210.9			144325	79122.7
	52785	38395.7			90765.7	58221.5			169276	104696
	69092.6	49358.7			131704	88050.7			248103	163226
	76196.3	55931			149300	97483.9			311705	197685
	70979.2	51751			137638	92579.5			265416	173547
	66808.6	47925.1			124840	83181.7			236074	153749
	57922.5	41530.9			102955	67272.4			192503	122164
	50308.1	37250.5			85879.9	54965.2			161785	98121.8
	45746.1	35465.1			77539.4	48275.1			149810	85833.1
	41185.8	33678.2			71313.1	43563.9			140213	75677.5
	639.135	465.001			1150.71	881.587			2144.48	1785.32
	792.454	541.256			1429.76	1057.83			2723.89	2074.55
	1193.05	746.026			2143.86	1418.17			4219.05	2578.7
	2775.82	1525.51			4645.87	2493.02			9325.59	4248.49
	6737.06	3286.93			11197	5231.8			23165.6	8547.1
	26137.2	12380.1			42968.2	17723.7			93223.2	28167.3
	44766.1	21812.4			73274.1	30173.3			169373	49305.6
	46904.7	24606.3			73801.5	32810.6			175771	54645.3
	43145.4	25413.8			63226.2	32248.9			150892	54506.8
	39438.4	26897.3			56000.2	32680			128210	55295.4
	38042.5	29712.6			54894.3	34186.2			120344	57684.7
	37926.5	32541.3			57767.2	36605.8			120920	61601
	38828.7	34648.2			62481.1	38557.3			127344	64852.2
	41238.8	35583.5			68288.8	41227.9			136706	70513.2
	41449.6	34399.7			69726.6	42371			137772	73927.7
	39369	34394.2			65486.1	39811.9			132040	67747
	37770.3	33799.1			60390.4	37882			123708	63426.9
	37392.2	32062.8			56237.8	36342.8			119056	61037
	38044.4	29379.7			54517.8	34025			120849	57570.6
	39558.8	26964.2			55760.1	32451.5			129228	55305.4
	42670.7	25342.5			62968	32129.8			148860	54029.1
	46339.7	24565.8			73477.2	32462.4			170636	53771.7
	44618.8	22016.8			73106.3	30110.7			164788	48535.1
	25573	12241.7			41884.6	17038.5			88576.3	27069.6
	6340.29	3102.5			10609.4	4879.53			21178.6	7924.38
	2520.18	1395.64			4348.94	2413.13			8658.65	4181.42
	44697.8	34927.4			75351.6	46667			146047	82981
	48859.1	36157.5			82926.5	52704.4			156525	94081.5
	55199.1	39483			97751.4	63708			182653	116269
	64399.3	45787.9			119281	79552.2			224115	148141
	71155.8	51109.4			136449	91699			259408	172560
	74120.6	54046.6			143113	95583.8			279908	182133
	62142.7	44167			112464	74244.7			209914	135325
	47601.4	35966			80365.2	50289.3			153239	90099.2
	41107.3	34460			69377.8	41947.1			137969	71972
	37540.4	32904			58882.5	37504.9			121364	62396.9
	38081.8	27707.6			53855	32829.9			121330	55673.5
	44087.8	24436.7			67234.7	31906			158724	53483.3
	37044.2	17940.8			60815.5	25110.9			134755	40148.3
	3567.86	1827.78			5821.25	2939.38			11748.4	4965.41
	984.26	647.409			1742.39	1201.98			3311.96	2252.37
	606.691	477.737			1092.69	910.073			2080.7	1792.71
	1942.91	1202.18			4513.34	3667.1			15151.3	13023.5
	15705.9	7624.24			30026.3	13216.1			75393	25823.8
	43832.3	20852			74590.2	28272.5			157433	45347.9
	49356.8	26906.7			79148.3	33123			184419	55392.7
	39977.8	27263.3			57012.2	30683.1			147194	55820.3
	35233.6	29535.8			49936.7	32377.9			123850	59874.5
	34746	32787.6			55351.5	35655			119994	63762.2
	39223	32910.8			66754.2	41547.4			137703	76667
	46749.4	34191.7			78202.2	50184.1			147060	94220
	66129.2	43884			116232	75522.2			210178	149928
	70487.3	47873.6			127930	83188.8			232904	167659
	69907.8	47503.3			127620	82995.6			232106	167127
	60254.1	41118.3			105609	68863			193847	134042
	50524.5	35683.6			84570.7	54728.2			157019	102976
	43060.2	32375.1			71945.1	45728.2			139562	85526.5
	38609.6	31154.1			61734.7	38874			116345	71351.6
	37269.7	32974.5			63716.7	39403.8			132794	72543.5
	3563.44	2550.82			7004.13	6273.13			14286.6	12853.4
	7989.07	4334.21			15169.7	7926.32			39120.1	16080.2
	23021.7	10740.3			42725.8	17264.1			98701.5	31041.9
	38259.2	17598			66812.6	24991.1			145074	40975.5
	47142.5	22618.4			77822.5	29846.3			164309	48050.4
	50458.4	25761.3			81906.3	32823.8			184713	54132.1
	48405.6	27188.2			75976	33038.1			178939	56102.3
	42446.3	26954.1			61549.9	31127.3			151837	55212.7
	38142	27101.3			52827.5	30570.6			135646	56187.5
	34721.9	28035.1			48272.2	30977.6			122574	57315.1
	34383.6	30505.6			49826.7	32791.4			115687	58685.4
	35246.7	33106.8			54228	34994.9			117952	62261.4
	36219.9	33973.8			59280.9	37153.2			125310	67031.3
	41645.3	33994.2			37130.9	25321.5			72782.5	39745.9
	41530	34500.6			36222.1	25439.8			62263.5	39182.7
	43843.9	28775			63632.3	31915.6			163100	57409.9
	49098.6	28924.5			77963.7	34025.4			187516	58397
	51513.2	27315.6			83767	34000.3			191361	56085.8
	67166	42797.1			75792.3	32769.7			155547	52838.1
	1882.77	1255.12			3538.15	2242.13			8755.07	4547.32
	650.949	486.938			1199.44	901.028			2395.06	1893.48
	518.42	397.462			952.172	775.83			1769.91	1587.59
	40474.6	33181.7			67695.6	42424.8			138411	79738.2
	44730.9	33399.6			73276.1	46935.4			143212	89314.2
	50054.5	34948.9			83198	53916.4			154285	102272
	60449.6	40756.8			104078	67730.6			189720	133301
	73132.9	47818			130914	85323.5			235969	172055
	61146	41227.7			106633	69215.9			192658	135454
	61198.8	41234.1			106395	68982.7			192015	134975
	41573.4	32580.3			69309.3	43670.2			137575	81507.3
	34001.8	31022.6			51062.7	33457.2			115488	59946.7
	35678.6	26982.6			49388.3	30324.1			130830	56986.2
	43676.9	26328.7			66868.1	31291.9			162542	54405.5
	47138.3	23802.9			77093.2	30724.3			167280	49865.4
	30716.6	14173.9			54764.4	20896.4			122081	35072.9
mean	38696.9	27014.9			63555.6	37148.9			131467	67186.8
SEM	1875.51	1371.97			3399.03	2273.01			6509.3	4427.06

## Sheet: Fig.2D
Fig. 2D-SOM with ChR2-V1 recording-no stimulus
	theta			beta			gamma
	still	running		still	running		still	running
	744.436	4922.07		1281.6	5673.19		2456.58	8610.25
	1675.25	5276.95		2824.5	4532.78		5503.34	9997.4
	11167.4	11572.4		18413.3	14876.3		37905.8	56154.3
	44708.8	31561.2		72851	50794		169525	257381
	40379.5	35729.8		58039.8	38362.6		135410	208163
	37197.5	39657.6		54611.8	34921.7		117101	183726
	38516.4	46514.2		63553	41905.5		128283	199375
	43703.5	58210.4		73690	49723.5		144325	224965
	52785	77024.5		90765.7	64228.9		169276	260879
	69092.6	100378		131704	95796.6		248103	352192
	76196.3	111885		149300	104697		311705	377207
	70979.2	106468		137638	102320		265416	367063
	66808.6	98719.2		124840	91948.2		236074	343600
	57922.5	86378.4		102955	74161.6		192503	291581
	50308.1	73405.1		85879.9	60589.2		161785	252644
	45746.1	62338.5		77539.4	52994.1		149810	236270
	41185.8	48645.4		71313.1	46398.4		140213	215342
	639.135	4182.91		1150.71	2871.97		2144.48	4705.62
	792.454	4124.59		1429.76	3304.36		2723.89	5789.14
	1193.05	4410.15		2143.86	3818.58		4219.05	7848.01
	2775.82	5879.34		4645.87	5783.71		9325.59	15145.1
	6737.06	8816.08		11197	11076.3		23165.6	35607.8
	26137.2	21282.1		42968.2	33710.5		93223.2	141483
	44766.1	33905.2		73274.1	55290.3		169373	263504
	46904.7	37074.6		73801.5	54058.7		175771	272622
	43145.4	37808.1		63226.2	44449.2		150892	232707
	39438.4	38780		56000.2	38755		128210	202896
	38042.5	42939.4		54894.3	41196.7		120344	195592
	37926.5	47453.7		57767.2	46859.9		120920	200553
	38828.7	58510.1		62481.1	66477.3		127344	228406
	41238.8	108701		68288.8	168665		136706	356607
	41449.6	53259.8		69726.6	46453.6		137772	213635
	39369	47526.1		65486.1	42856.3		132040	204110
	37770.3	42744.6		60390.4	38493.6		123708	190840
	37392.2	40190.5		56237.8	35406.1		119056	184625
	38044.4	37792.9		54517.8	34307.2		120849	187056
	39558.8	36348.5		55760.1	35747.3		129228	198718
	42670.7	35493.1		62968	42255.5		148860	227542
	46339.7	34988.8		73477.2	52113.6		170636	263299
	44618.8	32172.7		73106.3	53331		164788	254002
	25573	19960.4		41884.6	31831.2		88576.3	135011
	6340.29	7200.12		10609.4	8074.3		21178.6	28731.7
	2520.18	4903.86		4348.94	4202.03		8658.65	12222.6
	44697.8	58564.6		75351.6	49918.8		146047	226277
	48859.1	68993		82926.5	56421.4		156525	242008
	55199.1	80845.3		97751.4	68825.4		182653	274696
	64399.3	96749.3		119281	87662.7		224115	327876
	71155.8	106159		136449	101158		259408	359058
	74120.6	109632		143113	103862		279908	369126
	62142.7	91446.7		112464	80779.3		209914	309921
	47601.4	66134		80365.2	54218.4		153239	237852
	41107.3	51281.9		69377.8	45380.9		137969	212899
	37540.4	41571		58882.5	36872		121364	186806
	38081.8	36787.8		53855	34143.8		121330	187553
	44087.8	34497.2		67234.7	45768.9		158724	241828
	37044.2	26075.2		60815.5	43469.2		134755	203132
	3567.86	6018.33		5821.25	5294.45		11748.4	17084.8
	984.26	3708.52		1742.39	2233.85		3311.96	4945.47
	606.691	3542.3		1092.69	2434.57		2080.7	4135.15
	1942.91	7157.16		4513.34	13299.2		15151.3	39150.7
	15705.9	16364.5		30026.3	25179.7		75393	109989
	43832.3	29039		74590.2	55223.1		157433	223875
	49356.8	33276.4		79148.3	59404.5		184419	285441
	39977.8	32646.7		57012.2	40440.7		147194	234307
	35233.6	34300.9		49936.7	35049.1		123850	198826
	34746	43155.9		55351.5	42542.4		119994	189065
	39223	55627.8		66754.2	54222.7		137703	215391
	46749.4	65430.6		78202.2	60245.8		147060	229553
	66129.2	87745		116232	85877.2		210178	301747
	70487.3	97988.4		127930	95453.8		232904	314690
	69907.8	97747.2		127620	95355.4		232106	314276
	60254.1	81924.8		105609	76252.6		193847	280762
	50524.5	67856.3		84570.7	59638		157019	234603
	43060.2	55936.5		71945.1	49719.2		139562	210804
	38609.6	48946.6		61734.7	47493.5		116345	187066
	37269.7	39470.9		63716.7	41067.2		132794	194053
	3563.44	29000.5		7004.13	60484		14286.6	93199.6
	7989.07	11436.2		15169.7	13954.9		39120.1	60765.7
	23021.7	20697.3		42725.8	33842.8		98701.5	136425
	38259.2	27638.8		66812.6	51516.3		145074	200398
	47142.5	31741.9		77822.5	60689.4		164309	239657
	50458.4	34188.2		81906.3	64165.7		184713	286806
	48405.6	34197.1		75976	57693.6		178939	288285
	42446.3	33043.5		61549.9	44736.2		151837	242564
	38142	32610.1		52827.5	37198.7		135646	215872
	34721.9	32864.4		48272.2	33860.2		122574	199590
	34383.6	34669.8		49826.7	33788.4		115687	182773
	35246.7	37330.8		54228	36204.8		117952	178784
	36219.9	41028.9		59280.9	40187.9		125310	188525
	41645.3	59107.3		37130.9	75079.4		72782.5	163837
	41530	63174.3		36222.1	116914		62263.5	197697
	43843.9	33250.6		63632.3	46166.5		163100	263580
	49098.6	34309.6		77963.7	59715.3		187516	306333
	51513.2	34923.3		83767	66217		191361	306017
	67166	69053.3		75792.3	67634.7		155547	241804
	1882.77	4492.31		3538.15	3397.08		8755.07	12403.7
	650.949	2857.73		1199.44	1417.58		2395.06	3247.36
	518.42	2711.12		952.172	1159.63		1769.91	2224.08
	40474.6	49161.2		67695.6	46636.2		138411	207180
	44730.9	57044.1		73276.1	50922.7		143212	216638
	50054.5	65958.7		83198	58727.5		154285	229685
	60449.6	81164.1		104078	74709.5		189720	273253
	73132.9	98372.8		130914	95821.6		235969	328554
	61146	82959.6		106633	77430.8		192658	272687
	61198.8	83208		106395	77365.5		192015	272173
	41573.4	51476.9		69309.3	47392.3		137575	206248
	34001.8	33977.1		51062.7	34006.6		115488	175070
	35678.6	31664.7		49388.3	34945		130830	209700
	43676.9	31843.2		66868.1	48730.6		162542	257677
	47138.3	30993.6		77093.2	57872.8		167280	251831
	30716.6	21741.7		54764.4	40601.8		122081	163668
mean	38696.9	45456.3		63555.6	49021.7		131467	201373
SEM	1875.51	2753.15		3399.03	2730.28		6509.3	9225.16

## Sheet: Fig.2E&I
Fig. 2E and I-SOM with ChR2-V1 recording-no stimulus
Fig. 2E
theta						beta						gamma
Still-off	Still-on	Run-off	Run-on			Still-off	Still-on	Run-off	Run-on			Still-off	Still-on	Run-off	Run-on
16591	10738.7	14428.6	15670.7			32258.6	16190.6	24142.7	17878.6			50320	26980.2	62245.8	36680.5
38696.9	27014.9	45456.3	49526.1			63555.6	37148.9	49021.7	47458.1			131467	67186.8	201373	111648
44218.6	25919.2	56630.6	48049.6			66768.7	38719.8	44539.9	35993.3			119227	68114.5	171789	110026
18037.7	7827.7	15765.2	16018.4			28817.2	15877.7	28561.4	25761.5			80241.8	38974.1	111979	75980.2
Fig. 2I
-1189.25	2144.5	-2057.87	7651.77			2215.13	-751.267	-640.011	4158.52			10248.4	-9341.87	7103.26	-13491.8
-8934.2	16395.3	-7950.1	32760			17889	5687.7	871.186	29936.7			39231.9	-42340.5	40509.3	-43684.4
4024.65	-4298.52	689.375	8309.16			13205.8	-10067.3	2222.32	992.734			16385.4	-23017.4	26910.1	-43270.4
31011.8	30355.3	5838.54	27222.4			56756.1	18327.9	12487.5	25866.5			4216.84	-16617.9	4659.51	-10045.2

## Sheet: Fig.2H
Fig. 2H-SOM with ChR2-V1 recording-with stimulus
	theta								beta								gamma
	laser off			laser on					laser off			laser on					laser off			laser on
	ongoing	evoked	diff	ongoing	evoked	diff			ongoing	evoked	diff	ongoing	evoked	diff			ongoing	evoked	diff	ongoing	evoked	diff
	2465.83	2244.68	-221.149	1334.39	1845.35	510.96			2674.75	3776.37	1101.61	2115.78	2139.97	24.1831			3832.12	5423.49	1591.37	4398.69	2960.92	-1437.77
	20590.6	17734.9	-2855.71	9127.78	13553	4425.2			20132.7	27017.6	6884.94	14795.2	17410.9	2615.69			25773.7	37507.3	11733.6	30350.1	18725	-11625.2
	98499.1	82873.2	-15625.9	42536.7	62400.3	19863.6			91095.9	108128	17032	65473.1	82350.4	16877.3			129308	184771	55463.1	155399	93152.2	-62247.3
	86445.1	72377.4	-14067.7	38468.4	58719.3	20250.9			68904	76163.8	7259.78	51648.1	65653.5	14005.4			106626	151617	44990.3	126638	77492.7	-49145.7
	70868.7	58157.7	-12710.9	36284.9	57952.8	21668			59444.5	68115.5	8670.93	48286.5	59527.6	11241.1			93179.1	131307	38128.1	109717	70476.4	-39240.9
	54521.7	42616.7	-11905	37052.4	56227.8	19175.3			64134.4	81839.5	17705	54994.7	59372.2	4377.46			100467	143444	42976.5	116194	75658.3	-40535.2
	48241.4	39435.7	-8805.74	40813.4	55853	15039.6			73041.4	92296.8	19255.4	62544.7	63212.4	667.733			114692	162125	47433	129716	86762.2	-42954
	50376.1	44164.6	-6211.48	45842.9	55720	9877.09			84385.6	97653.2	13267.6	73852.3	70863.3	-2989.01			136416	175544	39128.5	147824	104951	-42872.4
	62097	57662	-4434.91	57094.8	62656.7	5561.9			120233	128496	8262.8	107422	96735.6	-10686.2			204042	239730	35687.7	212788	159228	-53559.8
	65227.8	61385.6	-3842.22	60789.5	66893.1	6103.62			136790	143217	6426.78	124356	108251	-16105.5			259444	295340	35896.2	270029	202196	-67833.6
	62674.1	58440.8	-4233.27	57908.9	63800.6	5891.64			125452	132641	7188.63	112621	100824	-11796.2			219488	254866	35377.6	228485	171630	-56854.8
	60637.2	55743	-4894.21	55727.6	61879.3	6151.74			113427	122543	9116.01	101154	92053.7	-9100.37			193312	229269	35956.7	202324	150105	-52219.4
	53641.9	48040.8	-5601.09	49213.9	57500.4	8286.47			94225	105664	11439.2	83306.5	78181.2	-5125.3			156042	193684	37641.9	166514	120572	-45943
	49034	42469	-6564.97	44511.9	55477.7	10965.8			80729.4	95441.8	14712.3	70369.4	68348.9	-2020.56			129974	171236	41262.3	142366	99614.8	-42751.2
	47835.4	40028.3	-7807.02	42216.4	55903.8	13687.4			75357.1	92845.9	17488.8	65040.6	64760.3	-280.333			120379	166602	46222.6	134290	91507	-42783.5
	47898.5	38666.1	-9232.33	39932.9	55557.6	15624.7			71106.1	91038.6	19932.5	60917.2	61858.9	941.67			112126	160179	48052.5	127021	84264.3	-42757.1
	1576.25	1473.02	-103.232	932.674	1233.06	300.389			1816.75	2542.52	725.769	1477.66	1438.8	-38.8647			2750.82	3839.08	1088.26	3164.82	2188.22	-976.607
	4786.1	4276.17	-509.934	2472.19	3468.17	995.98			4977.93	6937.56	1959.63	3812.14	4067.31	255.172			6652.94	9746.36	3093.42	7838.17	5006.9	-2831.27
	13040.8	11297.7	-1743.09	5926.51	8713.15	2786.64			12970.2	17756.8	4786.57	9705.97	10975.4	1269.46			16929.6	25034.9	8105.25	20074.9	12310.8	-7764.07
	53415.4	45287.5	-8127.85	23139.6	34111.4	10971.8			51539.6	65897.8	14358.3	37540.6	45428.9	7888.29			68179	99082.7	30903.7	80931.4	48772.5	-32158.9
	94640.3	79438.7	-15201.6	41043.9	59969.3	18925.4			90406.3	108921	18514.9	65293.8	81329.1	16035.3			127481	183063	55582.4	152811	91329.5	-61481.2
	102092	85544.7	-16547.6	43999.8	64862.7	20862.8			90948.2	105696	14748.2	65786.5	82589.5	16802.9			134960	193088	58127.4	161344	95982.3	-65361.7
	92771.9	77784.9	-14987	40531.7	60977.1	20445.5			76203.2	85243.1	9039.92	56199.6	71157.4	14957.8			117372	167522	50150	139759	84179	-55579.6
	81175.7	67601.7	-13574	37435.4	57891.1	20455.7			65088.2	71535	6446.84	50042.8	63511.9	13469.1			102528	145925	43397.6	120834	75477.4	-45357
	74652.3	61519.6	-13132.8	36811.9	58428.3	21616.4			61106.7	68888.9	7782.14	48701.5	61045.4	12343.9			96305.5	136209	39903.5	113287	72384	-40902.6
	67642.9	54566.4	-13076.6	36887.3	58823.7	21936.4			61013.7	72212.2	11198.4	50706.7	60608.3	9901.57			96020.5	135654	39633.9	112650	72802	-39848.1
	58381	45759.4	-12621.6	37743.8	58167.6	20423.8			63072.7	79531.9	16459.2	54188.8	59757.3	5568.56			99450.1	141668	42217.5	115900	75003.1	-40896.8
	52465.3	41217.3	-11248	40125.5	58488.1	18362.6			68465.2	88570.7	20105.5	59139.8	61768.3	2628.46			107346	154883	47537.3	123637	80875.1	-42762.3
	48534.6	38845.2	-9689.39	39716	55951.2	16235.2			70422	90665.7	20243.6	59851.1	61223.2	1372.17			109849	156908	47058.4	124916	82804	-42111.7
	52478.7	41013.7	-11465	38137.7	56647.2	18509.6			66160.5	85959.5	19799	56577.2	59607.3	3030.13			103276	148961	45684.7	118751	77493.5	-41257.6
	59388	47068.1	-12319.9	36771.5	57439.5	20668			61422.2	77157.9	15735.7	52387.6	58523	6135.35			96521.4	137089	40567.8	112274	72894.9	-39379.6
	68682.3	56065.9	-12616.4	36867.1	59263.6	22396.5			60300.9	71408.8	11107.9	49705.8	59991.4	10285.6			94706.5	133486	38779.9	110888	71825.4	-39062.9
	76065.4	63137.7	-12927.6	36967.8	58954.6	21986.8			61418.8	69355.2	7936.33	48660.5	60940.6	12280			96830.6	137157	40326.6	113950	72420.1	-41530.4
	83659.8	69925.8	-13734	38020.6	59054.7	21034.1			65792.3	72505.3	6713.01	50083.2	63737.6	13654.4			103084	146077	42993.7	122063	75737.4	-46325.5
	93823.9	79092.7	-14731.2	40752.1	61737	20984.9			76267.2	85961	9693.76	55899.4	70804.3	14904.9			115807	164592	48785.2	138456	83387.3	-55068.4
	103040	87099.1	-15941	44435.6	66060.7	21625.1			91989.7	108033	16043.3	66050.5	83314.5	17263.9			131736	186865	55129.3	158476	94778.3	-63697.9
	97707.9	82603	-15104.8	42464.2	62507.3	20043.1			92601.5	113006	20404.9	66489	83470	16981			125278	178207	52928.7	151133	91146.8	-59986.5
	56242.7	48122	-8120.73	24392.4	36240	11847.6			54063.2	70438.3	16375.2	38707.3	47669.8	8962.51			68102.1	97268.4	29166.3	80761.6	49551.1	-31210.4
	13038.2	11462.1	-1576.08	5881.33	8746.29	2864.96			12965.6	18316.8	5351.26	9515.16	10760.4	1245.28			16047	23534.2	7487.21	18904.6	11716.6	-7187.99
	4493.82	4037.27	-456.542	2241.36	3213.85	972.495			4752.31	6796.12	2043.81	3612.78	3798.98	186.196			6324.47	9182.66	2858.19	7424.1	4760.66	-2663.44
	1529.29	1420.74	-108.557	900.203	1192.36	292.159			1761.86	2464.08	702.222	1404.5	1399.13	-5.37281			2665.45	3704.89	1039.45	3069.25	2162.83	-906.415
	47661.9	39538	-8123.9	41527.2	55308.6	13781.4			74004	91848.7	17844.7	63430.4	63425.5	-4.83915			117009	162326	45317.6	130965	88620.9	-42344
	48285.8	41414.2	-6871.59	43484.2	54837.6	11353.4			78730.3	93729.6	14999.3	68275.6	66799.6	-1475.96			125919	167503	41583.4	138595	96352	-42242.7
	51530.8	45861.7	-5669.14	47047.7	55525.3	8477.62			90431	102276	11845.2	79488.4	75057.5	-4430.87			148678	186318	37639.9	158789	114758	-44030.7
	59283.6	54435.7	-4847.91	54241.5	60148.2	5906.77			109760	118949	9188.7	97695.3	89026.5	-8668.84			185225	220003	34778.1	193854	144134	-49719.3
	63196.5	58957.5	-4238.98	58086.3	63462.6	5376.22			125223	132702	7478.73	112021	100449	-11571.2			215488	250718	35230.1	223819	168341	-55477.8
	64552.9	60496.8	-4056.03	59821.1	65651.3	5830.2			131334	138125	6790.68	118202	104661	-13541.1			233122	268807	35684.4	242434	181717	-60716.6
	56868.6	51680.8	-5187.76	52081.4	59040.2	6958.84			102624	112955	10330.8	91098.9	83890	-7208.83			170886	207463	36577.1	180614	132362	-48252.4
	48182.7	40908.8	-7273.93	42984.1	55351.8	12367.7			77100.1	93376.2	16276.1	66583.5	65611.1	-972.4			122969	166617	43647.4	136206	93589.8	-42615.9
	49910.3	39633.1	-10277.2	39378.9	56371.6	16992.7			69560.4	90020.4	20460	59451.7	61285.9	1834.24			108891	156721	47829.9	124436	81655.3	-42780.8
	63160.7	50569.8	-12590.8	36550.8	57703.9	21153.1			60617.5	73890.1	13272.7	51212.4	59199.6	7987.19			95385	134922	39536.9	111407	72245	-39162.1
	77208.3	64128.9	-13079.4	36598.6	57373.5	20774.9			61887.5	68510.9	6623.39	48253.3	61046.9	12793.5			97594.8	138128	40533.4	114727	72469.6	-42257.2
	97231.8	81735.5	-15496.3	41940	62578.8	20638.8			82683.5	94453.7	11770.3	59844.3	75611	15766.7			123021	174618	51597.2	147414	87971.5	-59442.1
	78879.1	66690.2	-12188.9	34282.3	50219.5	15937.2			75016.6	93532.5	18515.9	54131.5	67026	12894.5			100451	144714	44262.2	120371	72459	-47912.3
	6591.02	5832.98	-758.04	3139.98	4582.44	1442.45			6766.4	9480.75	2714.35	5114.74	5585.09	470.357			8837.81	12916.7	4078.85	10420.5	6586.15	-3834.32
	118244	107191	-11053.7	51662.4	81939	30276.5			123944	199900	75956.7	79911.8	102786	22874.3			127614	184955	57341.3	150666	95435.9	-55230.5
	136734	122807	-13926.5	58682.4	96992.7	38310.3			125034	173211	48177	81327.3	108958	27630.6			149799	204285	54486.4	178261	112095	-66166.8
	109346	96272.4	-13073.7	46612.7	80634.5	34021.9			84129.7	105242	21111.8	57054.7	77284.3	20229.6			120147	168847	48699.8	143704	89246.6	-54456.9
	78976.7	66967.6	-12009	38672.7	68812	30139.3			62223.5	72962.8	10739.3	47694	62824.3	15130.2			99608.1	143088	43479.4	116730	75743.7	-40986.3
	60363.3	48634	-11729.3	36665.4	62096.7	25431.3			60990.6	77773.7	16783.2	50556	59903.8	9347.8			94716.4	135377	40660.1	110407	73764.2	-36643.2
	48640.7	38751.2	-9889.47	38448.3	56172.4	17724.1			71768.3	97093.5	25325.3	59152.4	62399	3246.63			109326	157849	48523.4	124343	84524.9	-39817.8
	47147.6	40453.5	-6694.05	41373	52394.5	11021.5			77209.9	93872.5	16662.7	65980.2	65428.8	-551.334			120760	161159	40398.6	131852	94387.2	-37465
	59461.4	54187.6	-5273.87	52821.5	58075.2	5253.72			106999	117463	10463.4	95279.7	86965.8	-8313.9			173539	205711	32172.7	181587	139091	-42496.3
	61978.5	57647.7	-4330.78	55412.2	59580.3	4168.12			117622	126156	8533.69	105590	94299.9	-11290.5			193078	223276	30198.8	200755	154782	-45973.4
	61557.3	57241.2	-4316.17	55041.2	59173.1	4131.93			117440	125984	8543.81	105441	94154	-11287.1			192796	223046	30250.4	200449	154529	-45920.6
	55211.4	49840.7	-5370.66	49214	56052.1	6838.13			98364.3	110328	11963.4	86790.2	80808.3	-5981.95			159440	194618	35178.2	168536	126791	-41744.6
	48478.3	42289	-6189.28	43177.3	52700.6	9523.28			81382.9	95690.4	14307.5	70265.8	68589.4	-1676.37			128900	166793	37893.6	139134	101138	-37995.7
	45148	38042.2	-7105.73	39372.1	51815	12442.9			73034.4	91259.4	18225.1	61705.5	62379.2	673.722			114615	157934	43319	126921	88981.1	-37939.8
	43047.3	34913.2	-8134.09	35914.4	50444.9	14530.5			60493.8	78650.8	18157.1	50938	53165.4	2227.36			86369.8	117797	31426.8	95951.5	70253.9	-25697.6
	48561.7	38215.6	-10346.2	37272.6	56153.1	18880.6			68653.2	93322.1	24668.9	56805.7	60575.6	3769.85			105038	152197	47158.8	120135	80964.9	-39170
	12909.2	12326.6	-582.584	5952.41	9845.7	3893.3			15575.8	28904	13328.2	10427.8	11335.9	908.156			20880.2	31423.5	10543.3	24805.8	15979.1	-8826.68
	58135.6	53197.5	-4938.06	24817.9	39990	15172.1			65992.9	118515	52521.7	42739.3	50688.3	7949.01			72288.2	108671	36383	85947.8	53113	-32834.8
	102557	93021.8	-9535	44471.1	70255.2	25784.1			111401	184810	73409.4	72318.6	90863.5	18545			115928	170511	54582.4	137909	85737.3	-52171.7
	125641	112934	-12706.8	54601.8	86181.5	31579.8			125318	192248	66929.8	82604	105806	23202.2			135370	192565	57195.4	159863	100840	-59022.9
	135114	120353	-14761.4	58300	93648.8	35348.8			126675	178498	51823	84236.7	109716	25479.7			150439	206739	56299.3	179222	112473	-66748.7
	133657	119069	-14588.1	56369.9	92928.2	36558.2			115963	154377	38413.2	76595.4	102817	26221.2			144823	197979	53155.3	174179	108284	-65895.6
	115951	102601	-13350	48901.6	82018	33116.3			90860.6	114591	23730.2	61318.9	82551.9	21233			124371	172400	48028.8	149757	92568.3	-57189
	99057.4	86320.3	-12737	43072.5	74303.7	31231.2			74096.5	89580	15483.5	52339.4	70072.2	17732.8			111218	156787	45569.4	132529	83117.2	-49412.2
	80154.4	68335.5	-11818.9	38130.1	66444.5	28314.4			62139.5	72137.6	9998.13	46788.5	61498.1	14709.6			99698.8	141555	41855.8	117481	75497.6	-41983.5
	75003	63465.2	-11537.8	37650.1	67047.7	29397.6			60096.3	71777.5	11681.2	47177.9	61296.3	14118.4			93474.6	133943	40468.4	108885	71949.7	-36935.5
	67183.3	55426.8	-11756.4	37497.4	65216.7	27719.3			60464.1	75614.1	15150	49721.5	60929.7	11208.1			93731.3	134308	40576.5	108967	72892.3	-36074.7
	55937	44186.7	-11750.2	36869.3	59993.5	23124.2			64047.1	84491.5	20444.4	53300.5	60333.9	7033.46			98434.3	141642	43207.2	114344	76275.5	-38068.7
	124692	111077	-13614.9	52817.8	92046	39228.2			98009.3	127444	29435.1	64561.2	88253.6	23692.3			131959	184264	52304.9	157552	97517.4	-60034.2
	140703	127616	-13086.5	59909	102635	42726.3			123274	170534	47260	79520.5	108202	28681.2			151153	208942	57788.9	179588	112921	-66667.6
	141683	128226	-13457.1	61582.8	102499	40916			134330	194981	60651.7	86392.1	114538	28145.7			155132	215200	60067.8	183064	115784	-67280.4
	124257	114256	-10000.7	62410.9	92915.5	30504.6			119000	182653	63652.9	77759.8	99895.4	22135.6			126875	177332	50456.8	147604	96724.4	-50880
	47068.5	38072.1	-8996.39	38711.5	55026.2	16314.7			72467.6	97806.8	25339.2	60008.8	62261.9	2253.14			111032	159509	48476.5	125484	85920.4	-39563.6
	46691.1	39445.5	-7245.62	40452.9	53122.6	12669.7			75120.5	94752.7	19632.2	63297.4	64123.8	826.386			117587	162221	44633.6	130100	91750	-38350.5
	48072.1	41975.9	-6096.17	42593.6	52111	9517.42			80665.5	95569.2	14903.7	69493.2	68127.3	-1365.84			126822	164686	37864.7	136970	100036	-36933.4
	54992.7	49475.3	-5517.39	48824.2	55721.2	6897.05			97102	109196	12093.5	85518.2	80136.6	-5381.64			156569	191264	34695.4	165507	125201	-40305.9
	64444.5	59578.3	-4866.2	57050.7	61425.7	4374.94			120243	130522	10279.9	107337	96798.1	-10538.6			195635	228386	32751	203363	157898	-45465.7
	55038.7	50018.6	-5020.15	48967.5	55051	6083.47			99024.4	109994	10969.4	87769.3	80977.4	-6791.84			158841	191570	32728.9	167393	126668	-40724.4
	55087.7	50072.3	-5015.45	49024.8	55101.1	6076.35			98745	109743	10997.6	87618	80841.9	-6776.06			158498	191071	32573.5	167067	126507	-40559.7
	46007	37952	-8054.99	38929.9	53228.8	14298.9			72285.9	93976.1	21690.2	60381.9	61878.6	1496.76			111637	157653	46015.8	124937	86418.1	-38518.5

## Sheet: Fig.2J
Fig. 2J—spike waveform classification
	BS				NS
	peak:trough ratio	trough to peak time	slope		peak:trough ratio	trough to peak time	slope
	-0.194913	0.85	0.0229207		-1.23214	0.35	-0.000813733
	-0.275603	0.7	0.0169718		-0.179244	0.45	-0.00630561
	-0.285721	0.7	0.0176221		-0.230121	0.3	-0.0177209
	-0.247781	0.75	0.0204477		-1.63	0.15	-0.0281058
	-0.203851	0.6	0.00642344		-0.373809	0.35	-0.028504
	-0.151486	0.55	0.00171062		-0.437682	0.3	-0.00820915
	-0.144765	0.8	0.00688238		-0.325421	0.2	-0.0384018
	-0.163289	0.6	0.0077672		-0.370561	0.3	-0.0226666
	-0.119553	0.7	0.00464608		-0.319706	0.5	0.00358081
	-0.21534	0.85	-0.00961476		-0.347158	0.3	-0.0378997
	-0.146542	0.8	0.0194401		-0.253286	0.45	-0.00430002
	-0.164914	0.85	0.0241569		-0.265846	0.25	-0.00488043
	-0.100059	0.85	0.00884684		-0.304975	0.45	-0.00189284
	-0.286588	0.65	0.0101877		-0.330607	0.4	-0.0177812
	-0.170153	0.75	0.00388731		-0.103252	0.45	-0.00422718
	-0.282348	0.65	0.0139479		-0.164729	0.4	-0.0201287
	-0.24915	0.7	0.0287504		-0.390237	0.3	-0.00968821
	-0.237079	0.75	0.0105971		-0.248812	0.3	-0.00464942
	-0.225903	0.7	0.0232507		-0.12821	0.45	-0.00181179
	-0.223995	0.7	0.00781617		-0.317506	0.4	-0.012558
	-0.200159	0.8	0.00656079		-0.359533	0.35	-0.0276329
	-0.32853	0.65	0.0236087		-0.372745	0.35	-0.0246911
	-0.17709	0.85	0.017993		-0.313544	0.3	-0.0141298
	-0.173189	0.85	0.0254385		-0.201663	0.45	-0.00233328
	-0.115529	0.65	0.0077573		-0.340847	0.4	-0.00960429
	-0.16253	0.7	0.0152426		-0.179928	0.45	-0.00416237
	-0.0894779	0.5	0.00265168		-0.34809	0.35	-0.0191948
	-0.229736	0.75	0.0127776		-0.350454	0.3	-0.0149871
	-0.115836	0.55	0.00197589		-0.376462	0.3	-0.0214678
	-0.269947	0.7	0.0252913		-0.158502	0.25	-0.00310338
	-0.143476	0.65	0.00455663		-0.312951	0.3	-0.0186945
	-0.135794	0.7	0.00747692		-0.377728	0.3	-0.0116824
	-0.157361	0.55	0.0113907		-0.389276	0.2	-0.00866353
	-0.131306	0.9	0.00526405		-0.402284	0.3	-0.0088515
	-0.11091	0.85	2.82839e-05		-2.13809	0.3	-0.0840506
	-0.131937	0.75	0.00805841		-0.267766	0.35	-0.0139666
	-0.119974	0.85	0.0080509		-0.489095	0.25	-0.00964842
	-0.151809	0.95	0.00747422		-0.617734	0.35	-0.0223324
	-0.141533	0.9	0.00804369		-0.200641	0.35	-0.0188927
	-0.3226	0.7	0.0196527		-0.303581	0.3	-0.0194599
	-0.247501	0.65	0.0265248		-0.218691	0.45	-0.0028212
	-0.231715	0.8	0.013543		-0.140928	0.4	-0.00642252
	-0.157455	0.6	0.00768568		-0.130115	0.45	-0.00158902
	-0.159256	0.7	0.00755016		-0.352884	0.3	-0.0120962
	-0.110134	0.85	0.00859344		-0.356084	0.25	-0.0472059
	-0.12535	0.9	0.0128896		-0.428816	0.3	-0.0142801
	-0.204992	0.8	0.0156263		-0.439618	0.3	-0.0177944
	-0.217112	0.65	0.0126217		-0.117393	0.4	-0.00420008
	-0.27346	0.65	0.0128509		-0.37324	0.5	0.00188692
	-0.317481	0.65	0.0315352		-0.338064	0.35	-0.0147042
	-0.159202	0.7	0.00397957		-0.278113	0.25	-0.011794
	-0.200727	0.7	0.00653628		-0.0889858	0.5	0.00122309
	-0.240647	0.7	0.0161534		-0.420974	0.45	-0.00469198
	-0.188888	0.65	0.00768943		-0.135142	0.45	-0.00484543
	-0.132797	0.5	0.00167896		-0.436721	0.3	-0.0177742
	-0.115509	0.9	0.00770322		-0.110699	0.5	0.00277485
	-0.320478	0.7	0.0209111		-0.379569	0.4	-0.0170453
	-0.159428	0.75	0.0049148		-0.228358	0.4	-0.0151724
	-0.210213	0.75	0.00897372		-0.131528	0.4	-0.00484308
	-0.216217	0.45	-0.00150074		-0.258092	0.45	-0.00548135
	-0.187731	0.75	0.0151572		-0.262754	0.3	-0.00631278
	-0.113156	0.9	0.00720531		-0.295135	0.25	-0.00710902
	-0.199857	0.75	0.0295603		-0.203423	0.4	-0.0192244
	-0.197636	0.6	0.013934		-0.236081	0.55	0.00975938
	-0.243306	0.65	0.0157707		-0.38486	0.3	-0.0219677
	-0.292151	0.6	0.036402		-0.300688	0.3	-0.0072909
	-0.259077	0.65	0.0179365		-0.146905	0.25	-0.00317094
	-0.208861	0.7	0.00795393		-0.110677	0.45	-0.00126453
	-0.269257	0.7	0.0261759		-0.370049	0.3	-0.0161251
	-0.362563	0.5	0.00276609		-0.147887	0.3	-0.0033204
	-0.211774	0.75	0.0169592		-0.4071	0.3	-0.0280504
	-0.213625	0.7	0.012497		-0.368339	0.25	-0.0133835
	-0.243874	0.5	-0.000635239		-0.12878	0.35	-0.0179169
	-0.216472	0.6	0.00401025
	-0.151383	0.8	0.0151679
	-0.346626	0.5	0.00202637	mean	-0.344944	0.35137	-0.0131064
	-0.459406	0.55	0.00695708	SEM	0.0358136	0.00984916	0.00156606
	-0.217038	0.55	0.00132818
	-0.0944085	0.7	0.00681954
	-0.170061	0.75	0.0157151
	-0.290274	0.55	0.00747088
	-0.310486	0.55	0.0216374
	-0.197299	0.7	0.00839354
	-0.298309	0.55	0.00599104
	-0.232492	0.75	0.0167569
	-0.162644	0.7	0.02044
	-0.237055	0.6	0.00397077
	-0.151679	0.85	0.00927748
	-0.127044	0.55	0.0023483
	-0.158547	0.85	0.00729242
	-0.203432	0.7	0.00641888
	-0.245885	0.75	0.0275946
	-0.203285	0.65	0.0210175
	-0.213737	0.8	0.020531
	-0.199734	0.9	0.0118354
	-0.246412	0.7	0.0104244
	-0.259149	0.75	0.0123291
	-0.259779	0.65	0.0126345
	-0.230215	0.75	0.0195701
	-0.217289	0.75	0.0275316
	-0.212362	0.6	0.0123977
	-0.140042	0.75	0.00642221
	-0.285202	0.65	0.0238171
	-0.265008	0.7	0.0119377
	-0.131326	0.9	0.00410808
	-0.0961687	0.8	0.00653426
	-0.156042	0.85	0.00860728
	-0.109112	0.55	0.00487655
	-0.108844	0.6	0.00690421
	-0.160517	0.8	0.000550723
	-0.208299	0.7	0.0136175
	-0.143291	0.7	0.0064882
	-0.22555	0.7	0.02156
	-0.149546	0.7	0.00490469
	-0.117898	0.85	0.000501712
	-0.157479	0.8	0.00602672
	-0.270031	0.7	0.0280169
	-0.249931	0.7	0.0195449
	-0.241767	0.75	0.021929
	-0.0790034	0.55	0.0068496
	-0.211377	0.6	0.00756445
	-0.0991359	0.95	-0.00250665
	-0.158979	0.95	0.0103015
	-0.155465	0.95	0.0135122
	-0.176027	0.65	0.00331713
	-0.192693	0.75	0.0102254
	-0.243872	0.8	0.0199288
	-0.240296	0.75	0.030091
	-0.238169	0.9	0.0184424
	-0.244511	0.95	0.00669134
	-0.17092	0.75	0.00905738
	-0.267406	0.75	0.0180829
	-0.242093	0.7	0.00794252
	-0.147609	0.6	0.000686945
	-0.190916	0.7	0.00893588
	-0.150932	0.9	0.00735663
	-0.130001	0.9	0.00545731
	-0.116848	0.6	0.00610732
	-0.112938	0.85	0.00595035
	-0.130199	0.75	0.0123806
	-0.111917	0.85	0.0104732
	-0.118579	0.75	0.00460169
	-0.201504	0.7	0.0121363
	-0.32544	0.65	0.0274232
	-0.166458	0.8	0.00778341
	-0.225161	0.75	0.0151018
	-0.250315	0.7	0.0173104
	-0.217596	0.75	0.0233553
	-0.339983	0.65	0.0324899
	-0.197127	0.8	0.0105507
	-0.358877	0.65	0.0259798
	-0.196525	0.9	0.0145172
	-0.162211	0.75	0.0081326
	-0.206793	0.75	0.0131517
	-0.132806	0.9	0.00786678
	-0.110612	0.65	0.00205916
	-0.188024	0.85	0.016575
	-0.1473	0.7	0.00562342
	-0.255185	0.7	0.0235015
	-0.234413	0.6	0.0172423
	-0.154669	0.75	0.00562949
	-0.168581	0.85	0.0175656
	-0.239578	0.7	0.0222527
	-0.203502	0.7	0.00899376
	-0.206363	0.75	0.0184457
	-0.260498	0.7	0.0228458
	-0.319695	0.65	0.0372257
	-0.15072	0.65	0.0064427
	-0.138905	0.75	0.0072718
mean	-0.199447	0.722189	0.0122915
SEM	0.0050769	0.00838101	0.000647857
pvals of BS vs. NS	1.02e-09	5.94e-35	3.9e-33

## Sheet: Fig.2K&L
	Fig. 2L-dFr vs. dpow—still & run—off vs. on—BS & NS														Fig. 2K-Firing rates—still & run—off vs. on—BS & NS
	Still-BS			Run-BS			Still-NS			Run-NS					Still-BS			Run-BS			Still-NS			Run-NS
	power change	Firing rate change		power change	Firing rate change		power change	Firing rate change		power change	Firing rate change				laser off	laser on		laser off	laser on		laser off	laser on		laser off	laser on
	-24.4315	-88.8285		-16.2666	-97.6686		-29.2785	-31.6059		-34.0069	20.2061				37.3222	3.84091		51.8571	5.26389		4.87778	3.86364		5.95714	6.13889
	-26.239	-34.3915		-32.0856	-61.605		-31.7979	-23.8256		-26.2262	-30.6522				12.6	7.18182		16.4429	5.90278		20.5778	16.1136		21.6286	14.6389
	-26.239	47.3164		-32.0856	49.8184		-31.7979	-43.4783		-26.2262	-69.482				1.96667	3.04545		3.64286	5.34722		9.2	4.80682		26.3857	9.08333
	-31.9812	-46.1351		-30.6403	-53.6105		-21.1046	-37.8637		-14.0047	-65.0241				7.97778	3.94318		6.52857	2.66667		27.8778	17.0114		53.0857	19.9583
	-32.9535	-30.0633		-26.6172	-64.8148		-27.7819	-26.2546		-31.1122	-89.8242				1.75556	1.17045		0.971429	0.541667		5.97778	4		21.2143	4.01389
	-34.7725	-16.6052		-25.8614	-42.8642		-32.0148	-63.4566		-29.6774	-87.9068				3.01111	2.36364		5.35714	3.30556		34.8444	11.1705		73.0571	11.7361
	-33.9731	-18.6922		-26.3196	-62.4899		-34.5197	-37.4		-27.1345	-48.8121				20.4333	16.4432		26.2857	11.7917		6.94444	4.11364		12.6714	6.63889
	-32.9098	-54.4725		-26.2658	-58.295		-33.0316	-3.29969		-35.3497	-62.5582				2.42222	0.863636		2.41429	1.09722		28.6222	27.2045		61.9571	27.3472
	-32.261	-47.8516		-29.0867	-76.7039		-44.8522	-91.4764		-44.2567	-86.323				2.84444	1.46591		12.0714	2.375		36.5	2.42045		38.2714	3.68056
	-31.8515	-25.993		-32.6414	-15.5135		-38.1021	-78.2339		-40.695	-57.2167				4.75556	3.44318		7.04286	5.44444		14.3444	3.36364		14.0143	5.18056
	-25.5967	60.6061		-32.1227	-77.4687		-36.6468	-75.5109		-36.1282	-93.2932				1.13333	2.32955		2.41429	1.69444		43.5	8.19318		79.3	6.98611
	-25.4252	-51.25		-31.3427	-32.7321		-41.5027	-76.8645		-40.4848	-64.5951				5.94444	8.22727		4.35714	13.1944		7.3	2.03409		4.21429	1.23611
	-26.7546	-72.3019		-32.4293	-50.9918		-37.9667	-81.6669		-40.6596	-89.1847				10.3444	7.45455		7.81429	7.72222		96.1222	17.4545		127.7	16.4583
	-26.7546	36.2654		-32.4293	219.029		-36.7653	-68.6443		-37.606	-59.3841				1.11111	0.613636		7.12857	4.83333		21.0222	6.81818		15.6857	6.13889
	-28.1775	-25.3078		-34.8632	3.31251		-45.6797	-78.9986		-38.8584	-94.1673				6.58889	1.75		3.01429	1.40278		64.1889	12.25		88.2	7.25
	-28.1775	-46.875		-34.8632	-42.959		-29.0206	-33.5108		-19.5503	18.2508				1.8	2.59091		0.414286	1.34722		4.28155	2.76699		9.05263	10.0351
	-28.1775	-41.646		-34.8632	-28.8639		-37.7161	-43.0578		-38.6277	-28.6277				8.12222	6.04545		8.38571	8.15278		35.2913	20.1165		51.5614	36.4561
	-29.332	-18.4594		-36.1895	-18.9488		-38.6887	-41.6991		-41.8957	-47.762				26.0444	13.5114		34.4429	19.5		27.2136	15.4951		58.3509	30.5439
	-29.332	-20.6401		-36.1895	-52.4557		-39.8623	-52.5068		-39.2493	-54.96				22.4111	12.5114		21.5571	14.4306		86.2621	40.2621		130.965	61.7719
	-29.332	-55.3047		-36.1895	-72.7432		-40.0489	-55.1258		-43.3782	-35.6798				24.3778	19.375		33.8143	26.2361		74.5922	33.7282		109.123	69.8596
	-34.4472	-44.0751		-27.1129	24.591		-29.7321	-44.3322		-21.015	8.14416				4.92222	2.06818		9.34286	3.16667		18.3398	10.3107		28.5614	28.9123
	-28.32	-8.16583		-33.3504	-0.430663		-40.1935	18.6594		-42.855	-19.9371				23.0556	10.6591		24.2714	15.6111		1.51456	2.02913		8.61404	6.45614
	-44.8522	-43.5314		-44.2567	-33.281		-42.7921	-27.2079		-40.587	-65.909				5.76667	3.55682		5.27143	5.66667		14.2621	10.1553		42.3509	15.7193
	-36.6468	-30.4348		-36.1282	-70.1525		-44.8342	26.2491		-37.0432	-46.1113				8.84444	7.92045		8.6	8.47222		5.46602	6.76699		12.2105	6.2807
	-36.6468	-54.3799		-36.1282	-67.9126		-40.6833	-83.1223		-39.8744	-67.7599				1.94444	4.20455		1.67143	5.34722		48.5534	7.52427		54.3158	18.5789
	-37.5137	-85.4317		-33.6823	-60.4724		-40.3342	52.2531		-39.437	-33.9982				8.78889	0.806818		9.95714	0.555556		10.7961	16.0971		22.3158	16.614
	-36.7604	-6.25		-35.7808	-8.45952		-37.9832	-34.2248		-42.0082	-37.8714				29.5444	16.8295		32.3286	20.2639		22.835	15.2427		39.8947	24.3684
	-41.2022	-63.6792		-38.2011	-95.4295		-41.2178	-45.262		-39.012	-73.2002				5.11111	3.36364		8.5	3.19444		7.70874	3.95146		14.0175	3.85965
	-41.5027	-69.8792		-40.4848	-73.9098		-41.3831	-37.6746		-38.1259	-64.9326				5.64444	2.625		15.5429	3.93056		10.1845	6.03883		24.1053	8.70175
	-42.548	-35.1622		-46.7513	-50.1502		-37.2567	-25.5449		-36.6892	-30.948				1.54444	0.397727		5.75714	1.58333		11.3786	7.47573		9.19298	5.75439
	-37.9667	-1.76056		-40.6596	-8.02469		-22.6711	-43.4546		-13.314	-74.4038				11.1111	10.1136		14.8857	12.8333		22.4167	17		22.2692	14.88
	-37.9627	-79.2193		-36.1722	-76.9795		-8.45714	-46.4662		-5.0894	-41.395				12.4222	3.76136		17.7143	4.22222		2.39815	1.48182		3.26923	0.54
	-37.5179	-29.1534		-40.7416	-53.2593										51.3889	32.8295		61.8143	32.2361		1.71296	2.18182		5.90385	1.38
	-39.098	-49.2666		-42.9991	-48.5934										11.0444	10.8977		12	10.6667		8.55556	8.21818		16.3269	4.5
	-39.0303	-62.7158		-40.559	-57.2764										6.94444	17.4205		11.7714	24.5972		4.23148	4.73636		21.8269	7.56
	-37.7161	-17.4556		-38.6277	-52.469										27.5556	4.21591		25.8	3.91667		69.2593	37.8636		41.0769	12.18
	-37.5992	-43.9265		-40.6959	-31.2689										2.95556	0.102273		4.37143	0.180556		3.68519	0.3		6.53846	0.28
	-39.8623	-44.5282		-39.2493	-58.312										9.67778	1.63636		9.74286	2.65278		19.6296	17.7909		32.2692	11.56
	-39.5266	10.026		-41.836	-20.8399										23.3398	16.0194		48.4912	23.6316		14.8426	5.20909		20.75	7.2
	-42.117	-18.4509		-41.109	-80.314										15.2233	7.81553		17	9.7193		2.97222	2.52727		5.11538	1.14
	-28.5403	-34.2156		-18.4895	1.20975										8.63107	2.99029		9.75439	4.63158		48.5463	33.1818		56.6154	21.46
	-28.8485	-88.6636		-17.2337	54.4008										5.41748	4.42718		15.1228	8.01754		3.51852	3.9		16.1731	10.64
	-40.1935	-43.3029		-42.855	-29.2406										16.5049	8.50485		18.7018	14.7895		11.7593	4.00909		28.7115	6.48
	-37.8058	-54.06		-41.7672	-46.5096										0.854369	0.407767		1.78947	0.859649		10.3889	4.51818		19.6923	8.58
	-44.8342	0.414654		-37.0432	-77.8234										2.60194	2.78641		7.7193	5.80702		4.85185	4.07273		4.42308	3.32
	-40.836	1.20383		-38.2042	-54.7149										3.47573	2.79612		6.63158	1.5614		7.35185	6.8		17.0577	4.62
	-37.7495	0.570791		-40.2664	-14.6403										13.6602	8.80583		12.5789	13.3509		14.1389	7.70909		12.5192	4.94
	-39.5541	-3.96808		-42.4274	-23.6508										1.4466	0.271845		0.719298	1.10526		10.9815	5.52727		35.75	7.32
	-36.8483	-45.8838		-38.8171	-51.0705										9.99029	5.62136		9.07018	6.29825		15.3519	15.7455		28.0769	15.22
	-37.9832	-28.8626		-42.0082	-11.4942										21.8155	10.0485		25.7544	14.1579		15.5926	21.7455		35.3462	12.9
	-41.2178	-46.306		-39.012	-72.4774										2.62136	2.57282		8.63158	2.54386		3.59036	2.8		4.5974	2.22667
	-36.6875	-35.7723		-37.285	-32.2206										0.902913	0.932039		2.70175	1.17544
	-28.1848	-5.57276		-30.6278	-78.7287										13.3301	13.1359		24.6491	21.1228
	-24.8161	-25.7005		-25.343	-48.955										11.5049	10.8544		25.7368	18.4737
	-22.6711	12.5471		-13.314	-32.2072										11.2524	5.90291		24.2632	11.5088
	-22.6711	13.8639		-13.314	-72.8729										7.15534	5.20388		7.75439	6.75439
	-22.6711	47.2823		-13.314	-67.7711										8.99029	4.48544		11.1579	3.15789
	-21.4694	-51.1825		-15.7704	-90.0338										1.61165	4.95146		8.29825	11.193
	-34.2531	-6.39781		-35.2421	-87.5688										16.165	10.3883		27.1228	18.7544
	-31.3074	11.1943		-32.0645	-93.9826										21.301	15.2233		32.4737	20.7193
	-29.3573	-42.0692		-30.2965	-47.1758										26.068	14.5825		42.8421	22.807
	-29.3573	-93.4039		-30.2965	-99.2051										2.83333	2.55455		4.15385	1.68
	-27.8034	-10.3496		-30.5365	-77.892										9.09259	7.15455		11.5385	7.06
	-27.2297	-25.6176		-32.3867	-22.7451										1.34259	2.29091		0.865385	2.84
	-27.2297	-6.20801		-32.3867	-17.4314										5.53704	6.13636		7.38462	5
	-27.2297	-27.5851		-32.3867	-58.9113										0.37963	0.354545		5.71154	2.8
	-27.2297	-32.3087		-32.3867	-73.2779										2.13889	1.04545		2.46154	0.68
	-27.2297	-20.4121		-32.3867	-37.5777										0.166667	0.654545		1.21154	0.24
	-25.6934	-31.394		-27.7948	-36.4499										10.8889	8.3		11.2885	8.08
	-22.9208	-62.1965		-22.3976	-69.4236										2.71296	2.47273		2.48077	1.76
	-22.9208	7.77328		-22.3976	-53.7638										18.8889	13.6636		31.2885	15.62
	-27.7779	-18.6196		-31.2847	-48.175										20.9167	14.2727		29.6538	10.52
	-27.7779	7.048		-31.2847	-32.5811										7.42593	5.88182		7.19231	4.26
	-36.9829	-18.062		-39.6024	-82.4223										15.4907	10.5364		14.9038	9.2
	-36.9829	-33.1317		-39.6024	-68.6472										1.08333	1.15455		2.86538	1.98
	-38.6376	-46.6917		-38.3604	-90.7427										24.0833	19.2364		29.8462	17.42
	-34.9306	335.368		-39.2699	-45.1737										14.9352	16.4364		19.5769	14.44
	-21.5586	-4.77876		-19.4203	-69.7191										1.55556	0.772727		2.44231	0.44
	-21.5586	-39.8157		-19.4203	-62.359										1.85185	1.18182		5.65385	0.84
	-21.7293	12.8643		-18.8858	-37.2658										1.11111	4.76364		2.15385	2.32
	-21.7293	-55.5687		-18.8858	-98.0608										4.18519	3.82727		9.80769	4.52
	-21.7293	-51.3707		-18.8858	-72.1695										2.00926	1.04545		2.90385	1.18
	-22.8179	-67.3571		-14.548	-60.1144										4.5463	2.05455		6.80769	1.16
	-23.5368	-64.988		-10.6212	-78.6952										3.46296	1.83636		14.2308	5.5
	-22.0824	-46.8111		-16.0317	-90.9073										3.4537	1.29091		13.1731	4.48
	-21.1675	-54.0051		-18.9293	-71.6427										2.67593	1.46364		5.17308	1.24
	-22.3372	-25.9888		-21.7261	-42.3491										23.3704	17.2818		46.2692	28.42
	-22.3372	-18.4411		-21.7261	-22.6087										1.26852	0.618182		3.11538	0.38
	-37.4161	-9.16346		-36.6561	-91.5811										0.685185	2.37273		2.53846	0.94
	-31.1596	-31.2266		-33.7479	-56.1872										30.2037	20.7091		37.2308	18.74
	-24.621	-58.8636		-23.3979	-58.1303										21.8704	9.27273		30.5	13.48
	-23.9029	8.20881		-16.7998	-57.9255										6.7963	7.50909		14.2308	6.94
	-23.5661	-45.4141		-21.8921	-37.5638										36.5648	30.9182		56.9808	27.86
	-31.189	36.4546		-26.3566	-83.1927										13.3704	12.6273		17.5962	13.7
	-19.4061	-12.6926		-17.8439	-29.7571										11.1296	8.20909		10.1538	6.9
	-12.0303	-17.8495		-6.54386	-54.6099										34.3148	24.3455		45.4038	21.32
	-6.92893	-25.3181		-7.84551	-26.4693										11.3519	10.5364		15.7885	8.88
	-6.92893	-59.2019		-7.84551	-46.5739										30.6852	27.0636		36.0577	27.88
	-6.92893	-40.9712		-7.84551	-19.5965										0.927711	0.482353		1.09091	0.413333
	-9.28925	-10.7097		-3.13759	-78.6087										15.4458	4.72941		36.2597	10.9333
															25.9759	13.9412		40.4805	23.8933
															8.18072	5.24706		13.9221	9.70667
															7.78313	7.01176		17.6234	17.9867
															6.13253	3.64706		12.7922	9.29333
															16.8313	6.14118		37.4935	12.1067
															0.698795	0.705882		1.5974	0.906667
															0.361446	0.364706		0.61039	0.426667
															0.120482	0.0588235		1.48052	0.266667
															4.37349	1.08235		18.3766	1.58667
															14.8434	10.9176		21.6883	16.3867
															3.0241	1.18824		5.80519	3.09333
															13.5422	7.64706		11.6234	8.85333
															23.8554	20.7059		23.6883	20.2667
															26.9398	9.6		38.9481	13.8
															29.3012	28.4471		38.1948	34.2933
															2.96386	1.25882		3.12987	1.90667
															2.40964	1.27059		4.37662	3.85333
															5.45783	5.43529		6.68831	5.54667
															2.6747	2.15294		3.11688	2.34667
															0.60241	0.6		1.01299	0.293333
															9.56627	10.7882		16.3377	14.4
															12.6988	5.01176		22.7792	9.82667
															1.07229	1.35294		1.45455	1.01333
															10.0602	8.45882		14.2987	16.2533
															0.626506	0.305882		0.922078	0.8
															8.03614	4.68235		12.0779	9.37333
															20.9157	15.9647		26.5714	21.88
															12.1084	11.5176		10.5974	9.44
															5.83133	6.05882		8.11688	7.36
															5.37349	1.90588		17.2597	11.0267
															22.5783	14.4471		24.4156	19.5333
															28.012	14.4824		42.4545	26.36
															3.38554	2.24706		3.27273	3.12
															5.56627	4.05882		8.03896	6.49333

## Sheet: Fig.2.S3C
Fig. 2.S3C-PV with ChR2-V1 recording-no stimulus
	theta				beta				gamma
	laser off	laser on			laser off	laser on			laser off	laser on
	14040.8	15021.7			22770.3	27796.7			29683.2	29921
	13955.7	15048.2			22518	27945.4			30224.9	30957.9
	12721	14226.9			19692.3	26286.5			28102.4	30800.2
	12524.6	13916.3			18295.2	24169.4			27655.6	29874.3
	9982.81	11261.2			13716.6	20239.8			21381.6	24027.7
	9835.54	11372.9			13021.5	19644.5			23550.8	25850.6
	7690.97	9827.42			6927.01	8823.26			9425.16	10873.1
	8814.26	11686.9			8027.27	11218.1			11018.6	13417.2
	9385.4	12649.5			8774.9	12979.3			12029.4	14861
	9462.58	12429.8			9100.64	13467.3			13432.2	15999.9
	9312.74	11940			9374.08	13278.9			15156.1	17368.9
	8999.2	11197.6			9758.15	13863.2			16947.6	19686
	8860.49	10013.7			10518.7	14933.8			19757.3	21309.5
	9717.11	11444.8			12616.5	19380.5			26416	29851.4
	11287.4	12671.9			18284.2	24743.8			26416.9	28686.2
	12320.1	13572.4			20282.3	26258.1			28488	29762
	13916.7	15452.9			23636.3	29413.5			31611.1	33064.9
	14581	16093.6			24949.1	30437.1			33003.9	34685.7
	11798.9	13247.9			19557.6	25610.4			27682.7	29256.7
	9792.86	10960.2			14261.5	20496.9			22765.8	24908.1
	8659.31	10025.8			12351.9	18731.9			26222.3	29142.8
	7662.16	9006.94			9291.55	13059.9			16972.9	19324.1
	8254.38	9360.44			12725.1	16957.5			22719.8	24681.7
	10176.8	10717.3			15290.1	20282.7			23657	24619.9
	8719.01	9794.9			12773.3	17503.6			21079	22565.7
	7611.83	9041.05			10614.4	14872.2			19169.2	21246
	7402.45	9402.15			8844.69	11932.8			15102.9	17448.1
	6211.04	8260.32			7172.65	10187.6			12038.4	14630.2
	6883.53	8986.12			8021.95	11255.3			13502.1	16216.7
	7409.14	10127.5			7845.53	11683.1			11753.4	14918.1
	7567.96	10093.4			7982.77	10916.2			11686.8	14430.1
	6765.47	9023.83			6989.81	9013.49			9789.48	12039.9
	4518.24	6522.92			4476.38	6046.1			6217.04	8460.61
	10384.2	11142.1			15792.5	21771.8			22820.3	25103.2
	12821.9	13526.8			19964	26304.7			26718.5	28921.2
	16423.9	17280			25440.6	31831.9			33588.6	35834.7
	20341.7	20974.6			31916.5	37193.5			41238.2	44402.8
	18740.1	19466.2			29427.1	35023.3			37860.1	40972.2
	17287	18556.1			26949.3	33300.1			34984.8	39347.5
	10913.5	11723.7			16780.6	22855			23808.6	26450.4
	7559.15	8685.82			11296.9	16188.4			17776.8	20501.1
	7648.78	9487.84			10569.7	14374.3			18236.5	21238.3
	7157.38	9428.26			8394.73	12178.5			15225.1	18581.5

## Sheet: Fig.2.S3D
Fig.2.S3D-PV with ChR2-V1 recording-no stimulus
	theta			beta			gamma
	still	running		still	running		still	running
	14040.8	10266.9		22770.3	14219.9		29683.2	37370.3
	13955.7	10245.2		22518	14480.8		30224.9	38034.3
	12721	8426.65		19692.3	12678.6		28102.4	34199.6
	12524.6	8827.9		18295.2	12482.4		27655.6	35371.3
	9982.81	6201.52		13716.6	9361.55		21381.6	26238.7
	9835.54	5864.99		13021.5	9502.22		23550.8	30137.8
	7690.97	2708.39		6927.01	4593.83		9425.16	11798.5
	8814.26	2957.26		8027.27	5218.84		11018.6	13816.1
	9385.4	3177.05		8774.9	5572.83		12029.4	15231.3
	9462.58	3376.89		9100.64	5790.71		13432.2	16928.1
	9312.74	3702.88		9374.08	6094.58		15156.1	19300.3
	8999.2	4103.83		9758.15	6900.62		16947.6	21821
	8860.49	4676.38		10518.7	7429.38		19757.3	24545.5
	9717.11	6484.14		12616.5	9217.67		26416	31394.9
	11287.4	8094.07		18284.2	12246.7		26416.9	32505.5
	12320.1	8803.64		20282.3	12825.2		28488	34806.3
	13916.7	10587.7		23636.3	14870.9		31611.1	39481.4
	14581	11121.5		24949.1	15690.9		33003.9	41769.9
	11798.9	8460.34		19557.6	12693.8		27682.7	33288.5
	9792.86	6161.9		14261.5	9676.96		22765.8	26460
	8659.31	5223.93		12351.9	9150.9		26222.3	33531.9
	7662.16	3795.27		9291.55	6566.47		16972.9	19957.3
	8254.38	6768.56		12725.1	8963.02		22719.8	31064.3
	10176.8	8759.78		15290.1	10175.9		23657	33518.5
	8719.01	7241.55		12773.3	8926.95		21079	30002.1
	7611.83	6032.11		10614.4	7452.38		19169.2	26984
	7402.45	4991.8		8844.69	6366.06		15102.9	21145.5
	6211.04	4051.76		7172.65	5175.01		12038.4	17002.8
	6883.53	4520.2		8021.95	5792.26		13502.1	18995
	7409.14	3822.95		7845.53	5463.67		11753.4	16382.9
	7567.96	3602.99		7982.77	5471.03		11686.8	15489.6
	6765.47	3140.66		6989.81	4754.63		9789.48	12933.2
	4518.24	2251.41		4476.38	3271.56		6217.04	8650.61
	10384.2	9234.55		15792.5	10431.3		22820.3	33379.6
	12821.9	11977.5		19964	12556.3		26718.5	40119.9
	16423.9	16016.3		25440.6	15869.8		33588.6	50605.5
	20341.7	20941.8		31916.5	20804.9		41238.2	65382
	18740.1	18430.5		29427.1	18737.3		37860.1	56552.5
	17287	16478.4		26949.3	16811.1		34984.8	51860.2
	10913.5	9533.83		16780.6	11016.5		23808.6	34055.2
	7559.15	6186.21		11296.9	7808.58		17776.8	25861.3
	7648.78	6227.76		10569.7	8093.8		18236.5	27136.4
	7157.38	4369.79		8394.73	6174.54		15225.1	20298.7

## Sheet: Fig.2S3E&I
Fig. 2.S3E&I-PV with ChR2-V1 recording-no stimulus
Fig. 2E
theta						beta						gamma
Still-off	Still-on	Run-off	Run-on			Still-off	Still-on	Run-off	Run-on			Still-off	Still-on	Run-off	Run-on
-96.8101	-13.4267	-85.8931	634.501			-118.718	497.851	531.77	4137.73			648.894	-768.909	-1758.27	-1213.55
-57.1251	1198.81	1150.82	1555.4			-455.943	1831.91	-770.996	1572.09			1989.02	3980.18	-968.634	1026.4
-1007	-4287.63	-2141.46	-3501.77			3322.35	3227.14	-3001.58	2895.88			169.991	-279.703	-7579.44	1575.43
376.179	360.045	-400.219	-398.298			201.263	446.99	-946.561	104.844			306.984	722.978	260.582	568.59
Fig. 2I
10374.9	11969.1	7391.83	7352.9			14581.3	19405.8	9706.57	10315.3			21788.8	24098.6	29195.5	33948.4
15347.6	16158.1	15353.5	29154.8			31362.1	34973.2	34070	65787.7			93752.7	98530.2	128166	175609
27825	23108.2	22136.6	24055.5			32366.9	32273.1	27658.8	27676.2			45807.1	48602.2	62209	60846.2
18713.9	17719.5	17897.3	130803			25965.7	29287.8	29427.7	116908			68681.7	74264.4	86758.7	134414

## Sheet: Fig.3
Fig. 3A-SOM vs. PV--ChR2
		theta				beta				gamma
		still		run		still		run		still		run
mean SOM		-11510.9		-753.964		-20865.8		-4793.56		-45000.1		-53262.8
mean PV		-1283.92		-12977.9		4426.06		2321.86		11956.4		9824.6
	Fig. 3B-SOM vs. PV--ChR2--Firing rates
	BS-still			BS-run				NS-still			NS-run
	SOM	PV		SOM	PV			SOM	PV		SOM	PV
	0.1029	1.1757		0.1015	1.1007			0.7921	2.1537		1.03051	0.9579
	0.57	1.0335		0.359	1.1053			0.7831	1.5179		0.676831	0.8486
	1.5485	1.2457		1.4679	1.0015			0.5225	0.9809		0.344252	0.7516
	0.4943	1.9246		0.4085	1.0738			0.6102	2.2707		0.375964	1.2405
	0.6667	1.3579		0.5576	0.7805			0.6691	2.2048		0.189207	1.4951
	0.785	1.04		0.617	1.1035			0.3206	1.6411		0.160643	1.0151
	0.8047	1.0107		0.4486	0.955			0.5924	0.484		0.523926	0.5855
	0.3565	1.4794		0.4545	0.8628			0.9505	2.4601		0.441389	1.0083
	0.5154	1.1783		0.1967	0.9709			0.0663	1.7436		0.0961698	0.9919
	0.724	1.3631		0.773	1.0275			0.2345	1.8751		0.369662	0.7239
	2.0555	1.3852		0.7018	1.2774			0.1883	1.5573		0.0880972	0.9995
	1.384	1.0816		3	0.9632			0.2786	1.6612		0.293315	1.181
	0.7206	0.9922		0.9882	0.9492			0.1816	0.7402		0.128883	1.7341
	0.5523	1.0971		0.678	1.2619			0.3243	1.0098		0.391368	1.2865
	0.2656	2.4069		0.4654	1.4			0.1908	1.9891		0.0821995	1.1075
	1.4394	2.5255		3	1.1384			0.6463	1.973		1.10853	0.9751
	0.7443	3		0.9722	2.4839			0.57	1.0189		0.707043	0.6064
	0.5188	1.0471		0.5662	0.7341			0.5694	3		0.523452	1.419
	0.5583	2.0339		0.6694	1.0048			0.4667	1.2873		0.471668	0.7155
	0.7948	0.7		0.7759	1.6375			0.4522	0.9477		0.640193	1.0998
	0.4202	1.4982		0.3389	1.2891			0.5622	1.0228		1.01229	1.1615
	0.4623	1.5591		0.6432	0.7171			1.3397	0.6468		0.749491	1.8361
	0.6168	1.6477		1.075	1.2377			0.712	1.0111		0.371168	0.8466
	0.8955	1.8919		0.9851	0.8238			1.238	1.146		0.514368	1.1607
	2.1623	1.1381		3	0.949			0.155	0.9907		0.342054	1.0327
	0.0918	1.3778		0.0558	0.7197			1.491	0.9629		0.744497	1.0024
	0.5696	2.2585		0.6268	1.2677			0.6675	1.244		0.610818	1.3394
	0.6581	1.1378		0.3758	0.4475			0.5126	0.9048		0.275344	1.0313
	0.4651	1.6606		0.2529	1.1591			0.5929	1.1452		0.36099	2.0175
	0.2575	1.0585		0.275	0.9744			0.657	0.8802		0.625954	1.7254
	0.9102	1.8312		0.8621	1.8319			0.7584	1.0443		0.668187	1.5996
	0.3028	1.0697		0.2384	0.9553			0.6179	1.0943		0.165176	1.0938
	0.6388	0.7096		0.5215	0.8836			1.2737	0.9607		0.233746	0.9326
	0.9867	1.2217		0.8889	1.3211			0.9606	0.9519		0.275618	1.0843
	2.5085	0.9607		2.0896	0.8898			1.1193	1.1499		0.346361	1.5393
	0.153	1.3837		0.1518	1.0438			0.5467	1.0181		0.296517	1.6484
	0.0346	1.436		0.0413	1.1075			0.0814	0.9291		0.0428235	0.8482
	0.1691	1.5159		0.2723	0.9015			0.9063	1.1803		0.358236	1.198
	0.6864	1.2774		0.4873	0.9367			0.351	1.198		0.346988	1.1292
	0.5134	1.0588		0.5717	1.1016			0.8503	1.0963		0.222857	1.3055
	0.3465	1.4517		0.4748	0.7978			0.6835	1.6106		0.379049	0.9974
	0.8172	0.9913		0.5302	1.0795			1.1084	0.9609		0.657883	0.8782
	0.5153	0.8723		0.7908	0.7143			0.3409	0.9372		0.225693	0.9525
	0.4773	1.2192		0.4804	0.8028			0.4349	1.2625		0.435703	1.0397
	1.0709	0.7445		0.7523	2.3255			0.8394	1.1435		0.750609	1.2749
	0.8045	0.872		0.2354	1.176			0.9249	1.2179		0.270846	1.2632
	0.6446	1.0311		1.0614	0.8972			0.5452	1.0268		0.394593	0.9007
	0.1879	0.994		1.5366	1.0412			0.5033	1.3034		0.204755	1.2745
	0.5627	0.9879		0.6944	0.9993			1.0256	1.6273		0.542082	1.2191
	0.4606	0.9903		0.5497	0.85			1.3946	1.8787		0.364962	1.2365
	0.9815	1.0549		0.2947	0.8654			0.7799	1.1024		0.484331	1.0751
	1.0323	1.0054		0.4351	1.0652				0.9693			1.3239
	0.9854	0.8392		0.8569	1.0952				1.7026			1.4791
	0.9435	0.6553		0.7178	0.9857				1.455			1.3639
	0.5246	1.1897		0.4743	0.7243				1.6808			1.6291
	0.7273	1.0625		0.871	0.9723				1.6142			1.3778
	0.4989	0.9913		0.283	1.1214				1.1038			1.1051
	3	1.0112		1.3488	0.9484				1.0078			1.1543
	0.6426	1.0476		0.6915	1.033				0.9908			1.0113
	0.7147	1.0693		0.638	0.8624				0.9565			1.2294
	0.5594	1.0908		0.5324	1.3953				1.0334			1.1091
	0.9016	0.9021		0.4044	1.8254				1.2901			1.3173
	0.7869	1.0741		0.6119	0.9949				1.0366			1.0714
	1.7063	1.354		3	1.0308				1.0498			1.2554
	1.1082	1.4932		0.6771	1.4458				1.039			0.9911
	0.9339	0.9567		0.4902	0.8728				1.0813			1.2283
	0.4888	1.3444		0.2762	1.1264				0.1573			1.0363
	3	1.0595		0.1981	1.0058				1.108			1.298
	0.7622	1.1685		0.7158	0.6888				0.7024			0.593
	0.9114	1.1039		0.7095	1.3627				2.2801			2.5058
	0.7234	1.0168		0.4992	0.4024				3			3
	0.6824	1.1982		0.3548	1.101				0.6447			2.078
	0.7921	1.1129		0.5923	1.0529				1.3991			0.744
	0.6802	1.3234		0.6173	0.6258				3			3
	1.0657	1.113		0.691	1.0174				1.6906			1.9976
	0.7987	1.0321		0.5837	1.0159				3			3
	1.1005	1.0885		0.7376	1.0922				0.6262			1.1433
	0.4968	0.9878		0.1802	0.8643				1.1732			1.277
	0.6382	0.9286		0.1486	0.9594				3			3
	3	1.196		1.0771	1.1067				3			3
	0.9145	0.9836		0.4609	0.9714				3			3
	0.5203	1.0461		0.4064	1.1138				1.6922			1.14
	0.4519	1.2243		0.1704	1.3565				2.4551			1.6971
	0.5303	1.1652		0.3865	1.0635				1.9814			3
	0.3738	1.0019		0.3401	0.9619				3			3
	0.547	0.9402		0.2397	0.8129				3			3
	0.7395	1.0911		0.6142	1.0516				0.206			0.2475
	0.4873	0.9716		0.122	0.9981				1.1861			1.41
	3	0.8967		0.3703	0.7881				1.1831			1.3823
	0.6856	0.8794		0.5033	1.0338				0.7636			1.8063
	0.424	0.7964		0.442	1.1937				1.0486			1.2
	1.1049	1.4795		0.4877	1.3				1.5274			3
	0.8456	1.7155		0.4889	2.5775				3			3
	0.9444	0.8643		0.7786	0.8897				0.9267			2.25
	0.7376	1.0816		0.6795	1.0453				3			2.5
	0.7095	2.0797		0.4696	1.5476				3			3
	0.9282	1.4195		0.5624	1.4255				2.1668			3
	0.882	1.7835		0.7732	0.9235				0.4318			0.5
	0.5199	1.2736		0.3789	1.2769				2.5153			3
	0.3062	1.2948		0.3015	1.0481				0.5556			1
	0.5367	1.3084		0.5902	2.3303				1.2147			3
	0.6414	0.9778		0.6972	0.7467				2.1518			3
	0.9009	1.1168		1.0206	1.2693				3			3
	0.5947	0.8749		0.7265	0.6491				3			3
	0.3649	1.0412		0.3229	1.1068				0.553			3
	1.0101	0.9012		0.5676	0.907				0.8942			1.0302
	1.009	0.8429		0.699	1.2674				1.0584			0.9001
	0.4882	0.9419		0.1801	0.9346				0.9668			0.9491
	0.2475	1.2508		0.0863	1.0191				0.8783			0.9766
	0.7355	1.2138		0.7556	1.0752				1.4288			0.8969
	0.3929	1.2156		0.5329	1.3256				0.973			0.9644
	0.5647	1.2463		0.7617	1.4842				1.4925			1.0006
	0.868	1.0639		0.8556	0.9811				1.1535			1.0318
	0.3564	1.0302		0.3543	1.2235
	0.9708	0.9981		0.8979	1.068
	0.4247	0.9962		0.6092	1.1195
	0.5273	1.0481		0.8804	1.0137
	0.9959	0.8946		0.8293	1.039
	0.8049	0.9332		0.7529	1.2521
	0.996	0.902		0.2896	0.7071
	1.1277	1.0101		0.8814	1.2421
	0.3947	1.0843		0.4314	0.9769
	1.2617	0.8488		0.6967	1.2554
	0.8408	1.0392		1.1367	1.3939
	0.4882	0.7713		0.8676	3
	0.5827	1.0971		0.7761	1.0039
	0.7633	1.1151		0.8234	1.655
	0.9512	1.0422		0.8908	1.3255
	1.039	0.9783		0.9068	1.1688
	0.3547	1.0675		0.6389	1.7241
	0.6399	0.9147		0.8	1.0606
	0.517	1.027		0.6209	1.0618
	0.6637	1.1259		0.9533	1.3131
	0.7292	1.1109		0.8077	0.9659
		1.0518			0.9842
		0.8019			1.3636
		1.1606			0.9764
		1.0589			1.4286
		1.0039			1.1111
		0.9939			1.2759
		1.0454			0.9253
		1.1334			1.2787
		3			3
		1.0565			1.7359
		2.014			1.6217
		1.4228			1.1844
		1.8414			1.76
		0.8384			1.2655
		1.1096			2.1393
		0.9649			0.99
		3			2.8467
		3			3
		1.6282			2.2212
		2.2409			1.74
		0.5785			0.135
		3			3
		3			1.7032
		3			3
		1.9907			2.85
		1.931			2.5245
		3			3
		1.9238			3
		3			1.843
		1.6917			2.7249
		1.1002			0.6844
		0.7789			3
		2.7968			2.1636
		0.6867			1.4
		1.5897			3
		2.0786			3
		0.5702			3
		1.9612			0.6667
		0.5854			1.3333
		1.5615			3
		1.078			3
		1.2213			2
		1.4067			3
		0.8981			0
		1.0203			0.6255
		0.882			0.7814
		1.0121			1.2526
		0.9731			0.9619
		1.2293			0.8504
		0.8446			1.0094
		0.9068			0.9956
		1.3711			1.0174
		0.9328			0.9497
		0.9479			0.9169
		1.0286			1.0226
		0.9254			1.2951
		0.8396			0.8477

[truncated: 40 more sheets: Fig.4B&C-ctrl, Fig.4E-ctrl, Fig.4F-ctrl, Fig.5, Fig.5.S1C, Fig.5.S1D, Fig.5.S1E&I, Fig.5.S1H, Fig.5.S1J, Fig. 5.S1K&L, Fig. 5.S2C, Fig.5.S2D, Fig.5.S2E, Fig.5.S2H, Fig.5.S2K, Fig. 5.S2E&I, Fig.6A&D, Fig.6B&E, Fig.6C&F, Fig.6G&J …]
