# Supplementary figures and images for: Gamma rhythms and visual information in mouse V1 specifically modulated by somatostatin+ neurons in reticular thalamus
Source: eLife journal article supplement (doi:10.7554/elife.61437), 2021-04-12

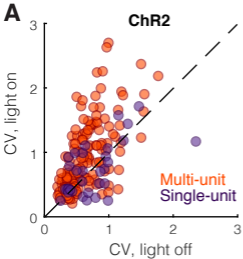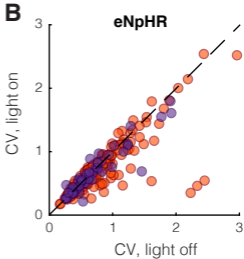

Supplement: supp [file elife-61437-supp-v1.zip]

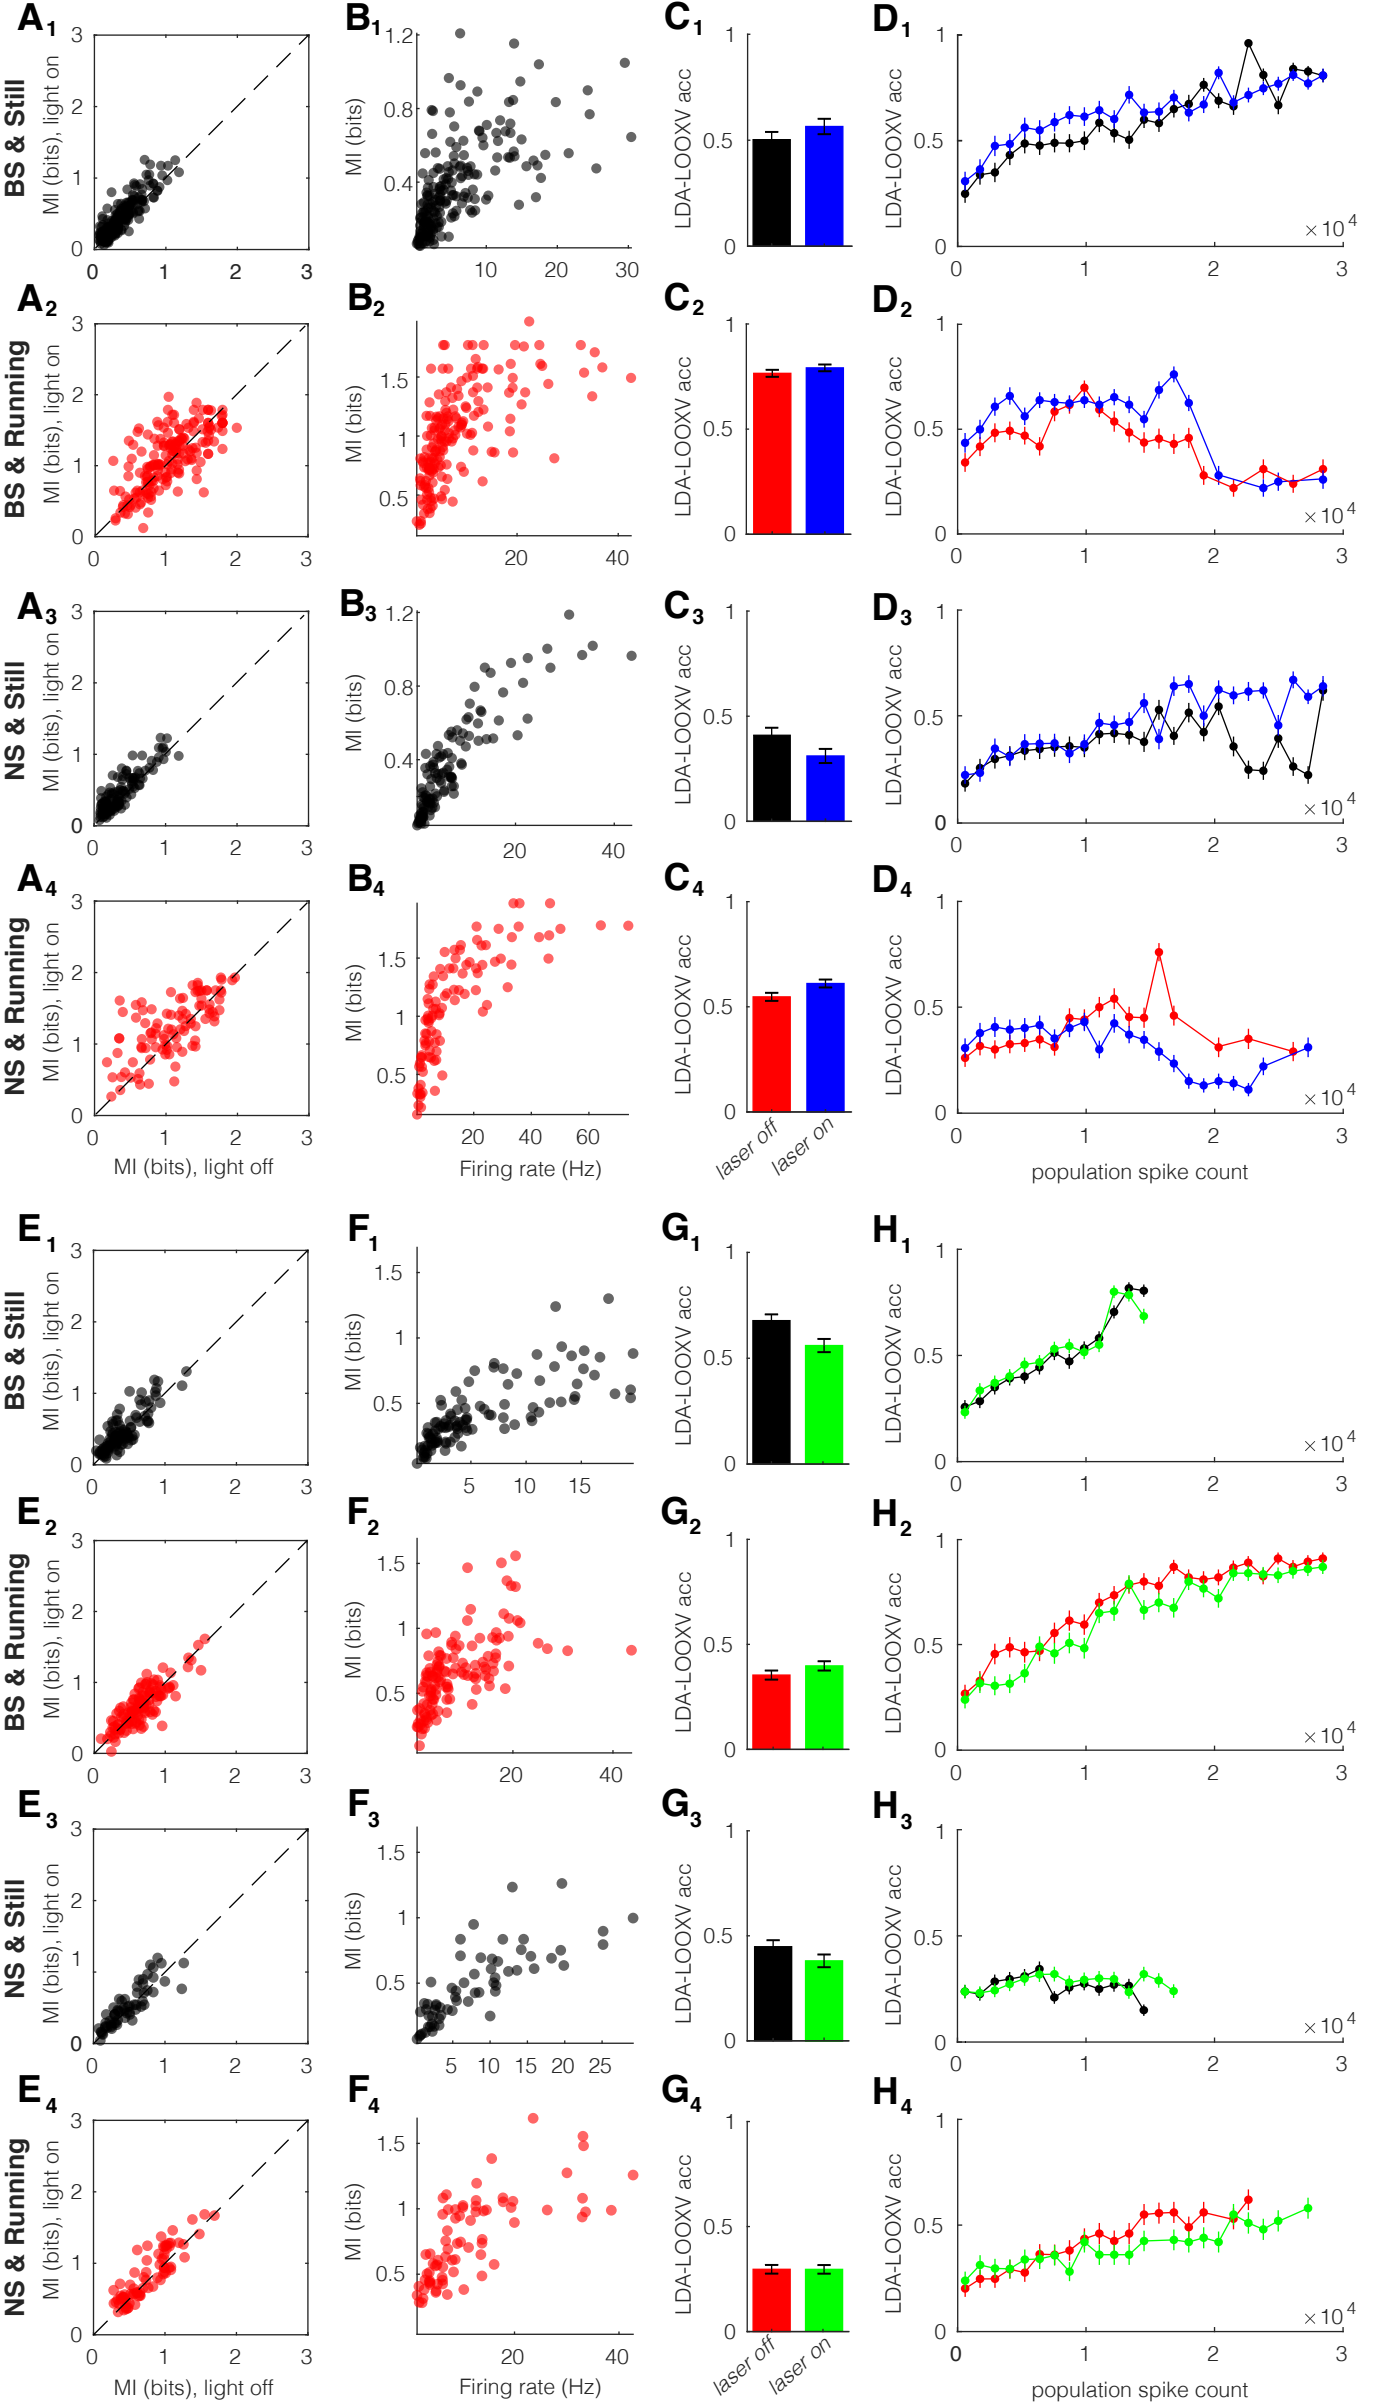

Supplement: supp [file elife-61437-supp-v1.zip]

**A**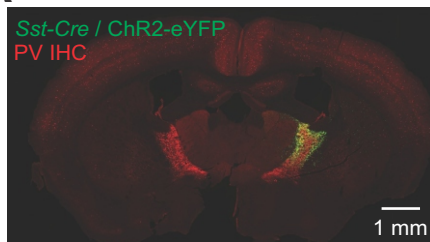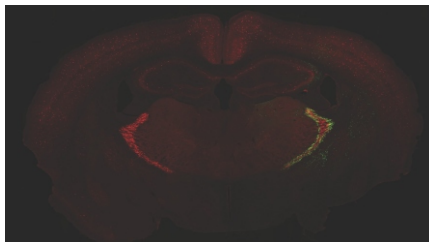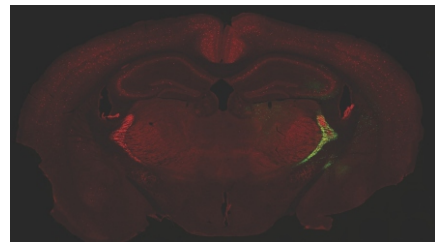**B**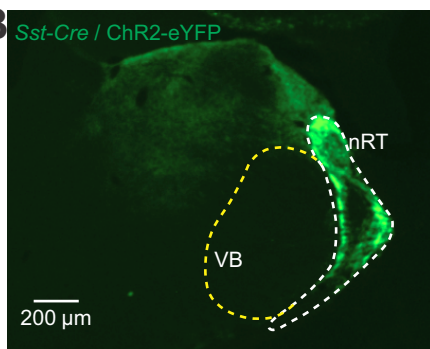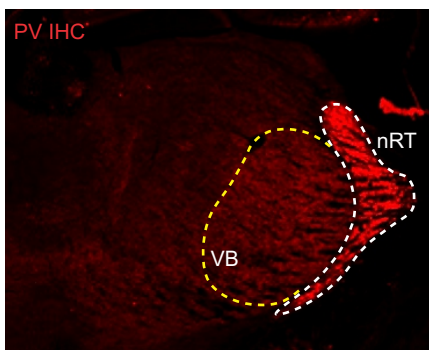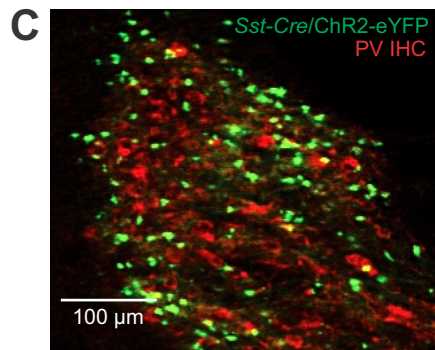**D**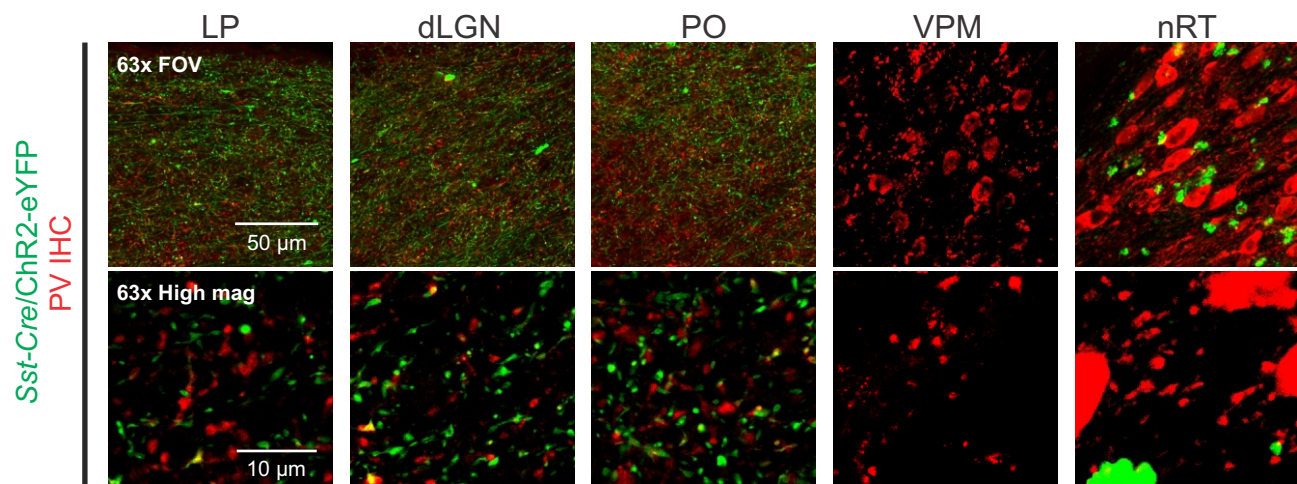**E**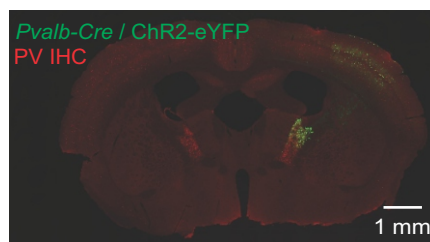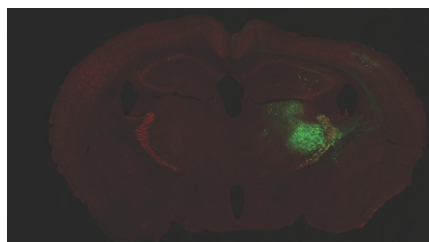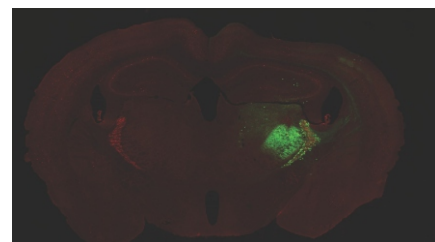**F**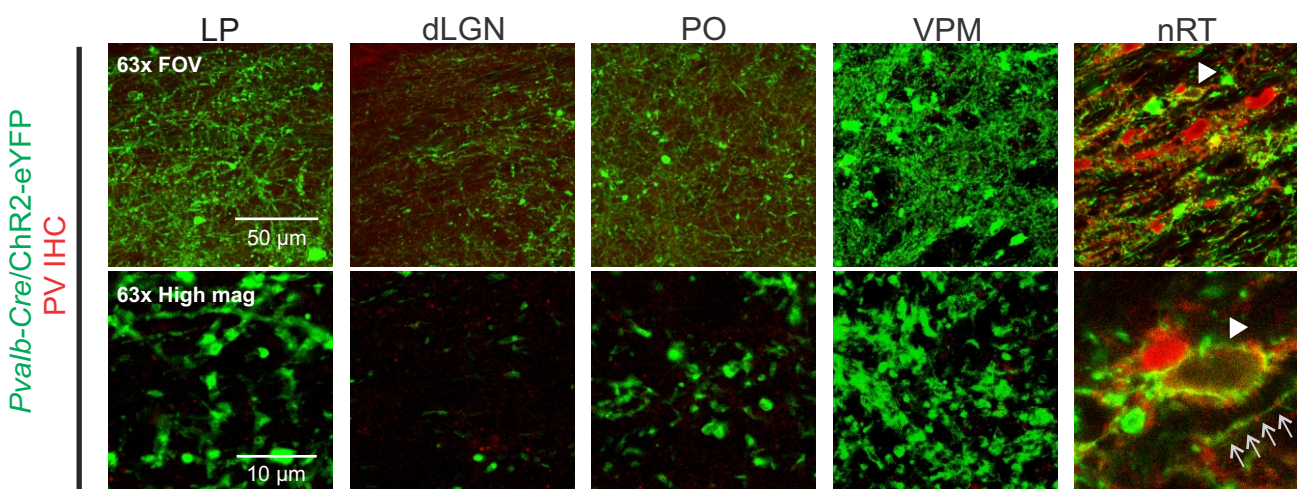

Supplement: supp [file elife-61437-supp-v1.zip]

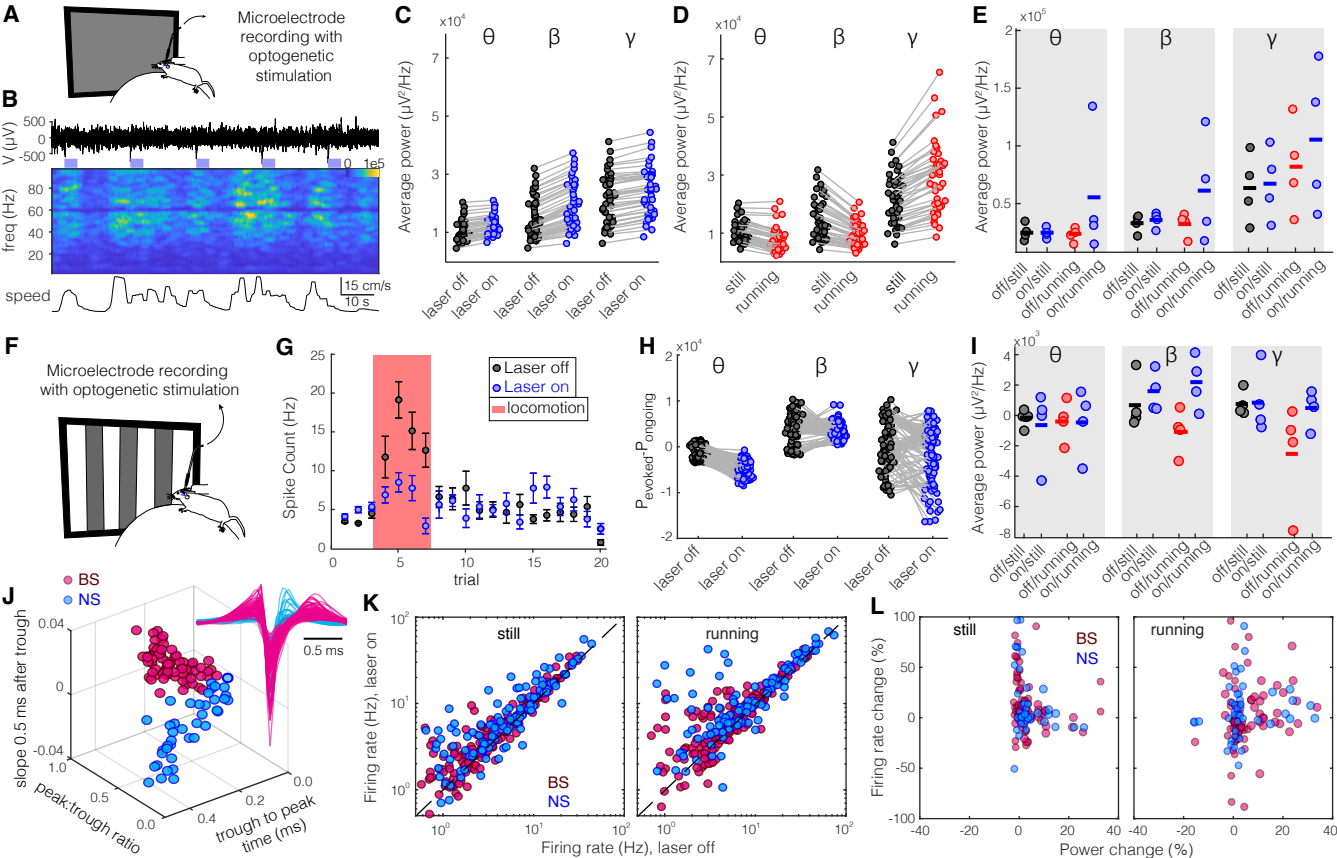

Supplement: supp [file elife-61437-supp-v1.zip]

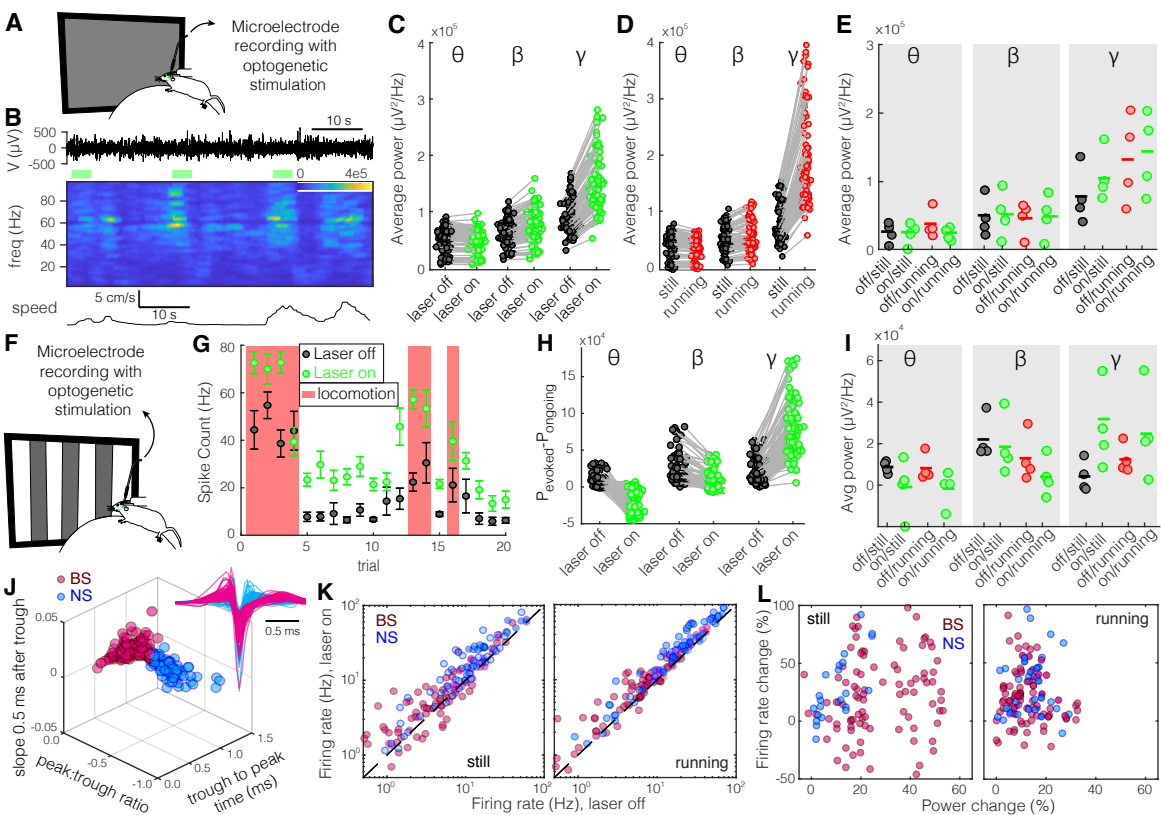

Supplement: supp [file elife-61437-supp-v1.zip]

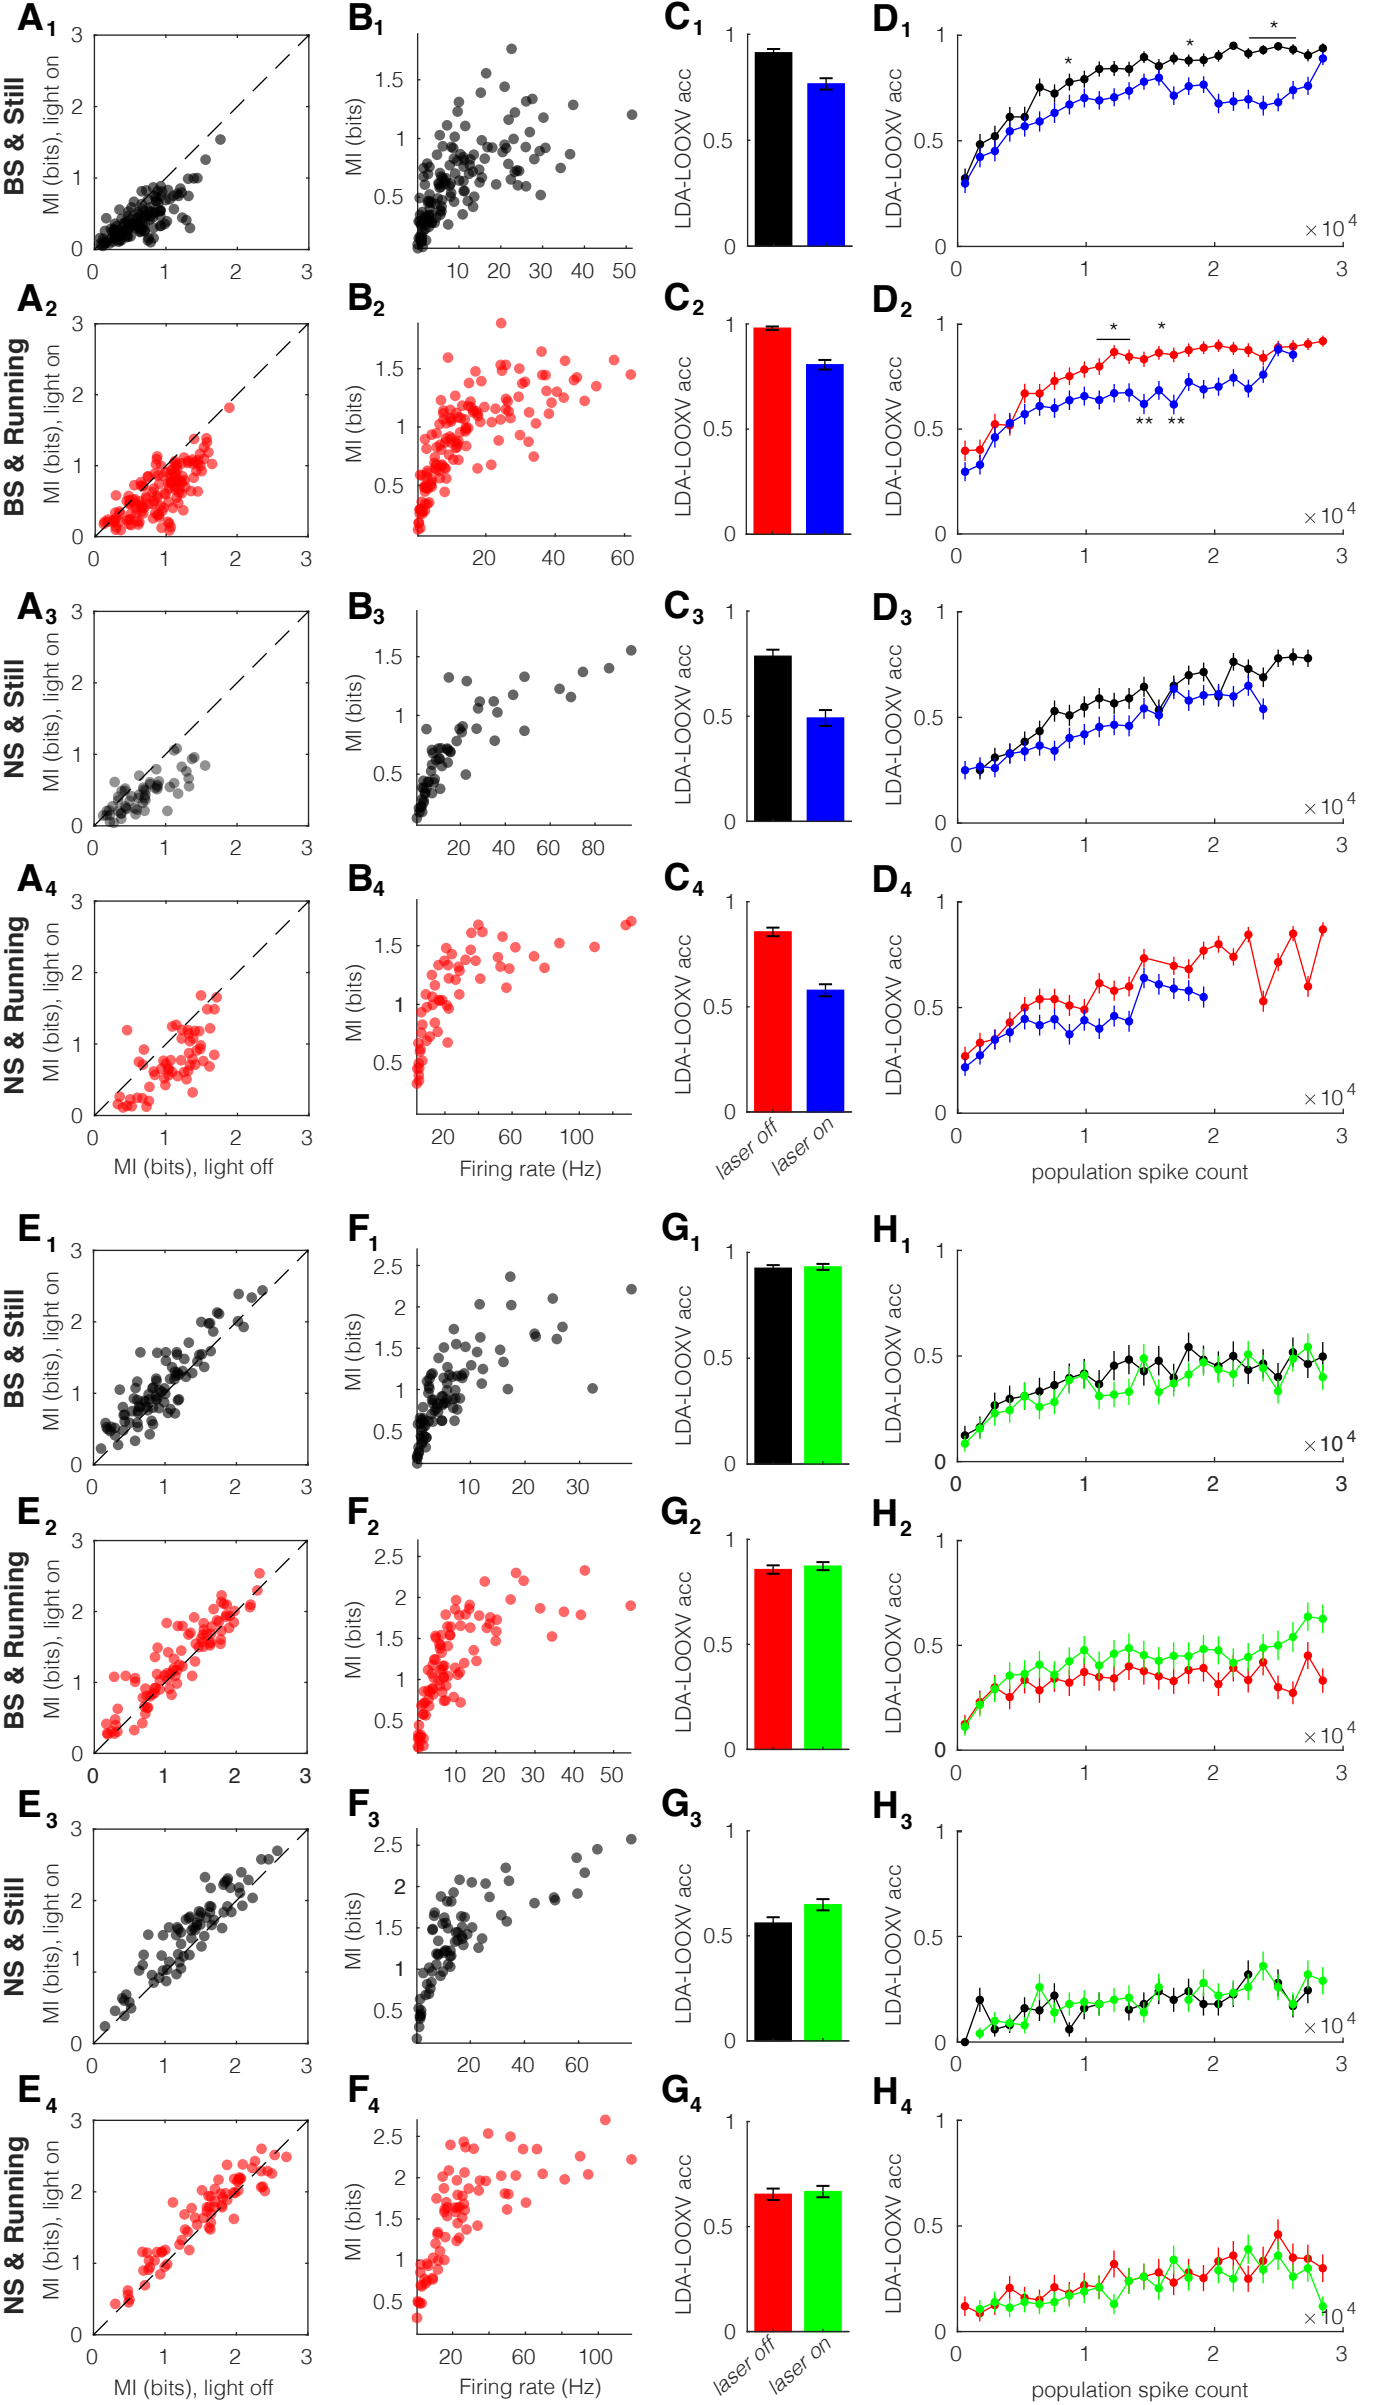

Supplement: supp [file elife-61437-supp-v1.zip]

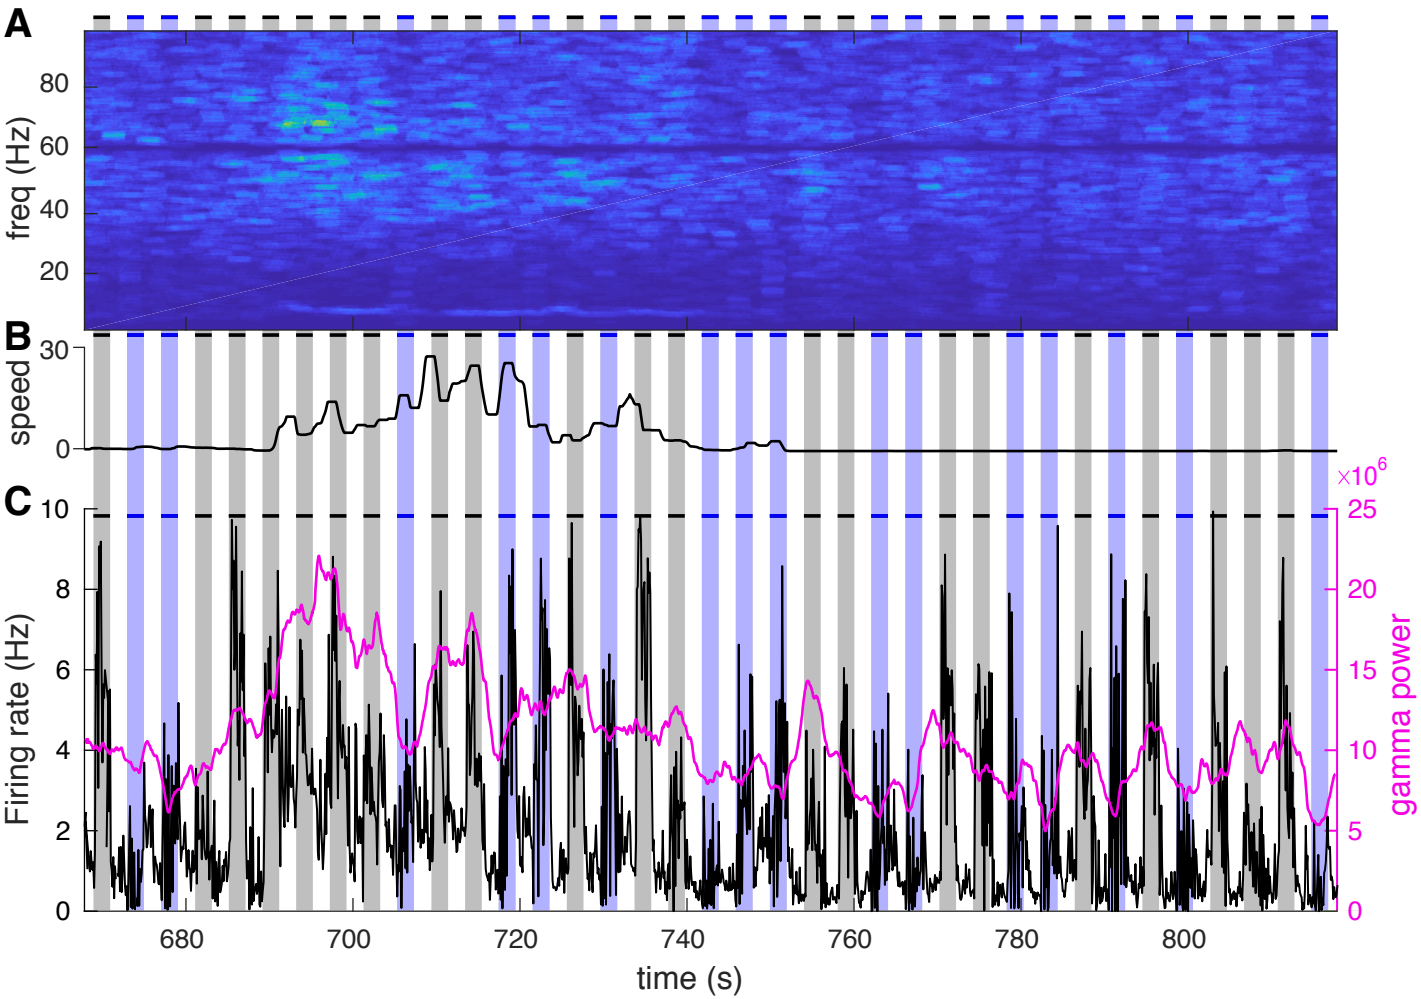

Supplement: supp [file elife-61437-supp-v1.zip]

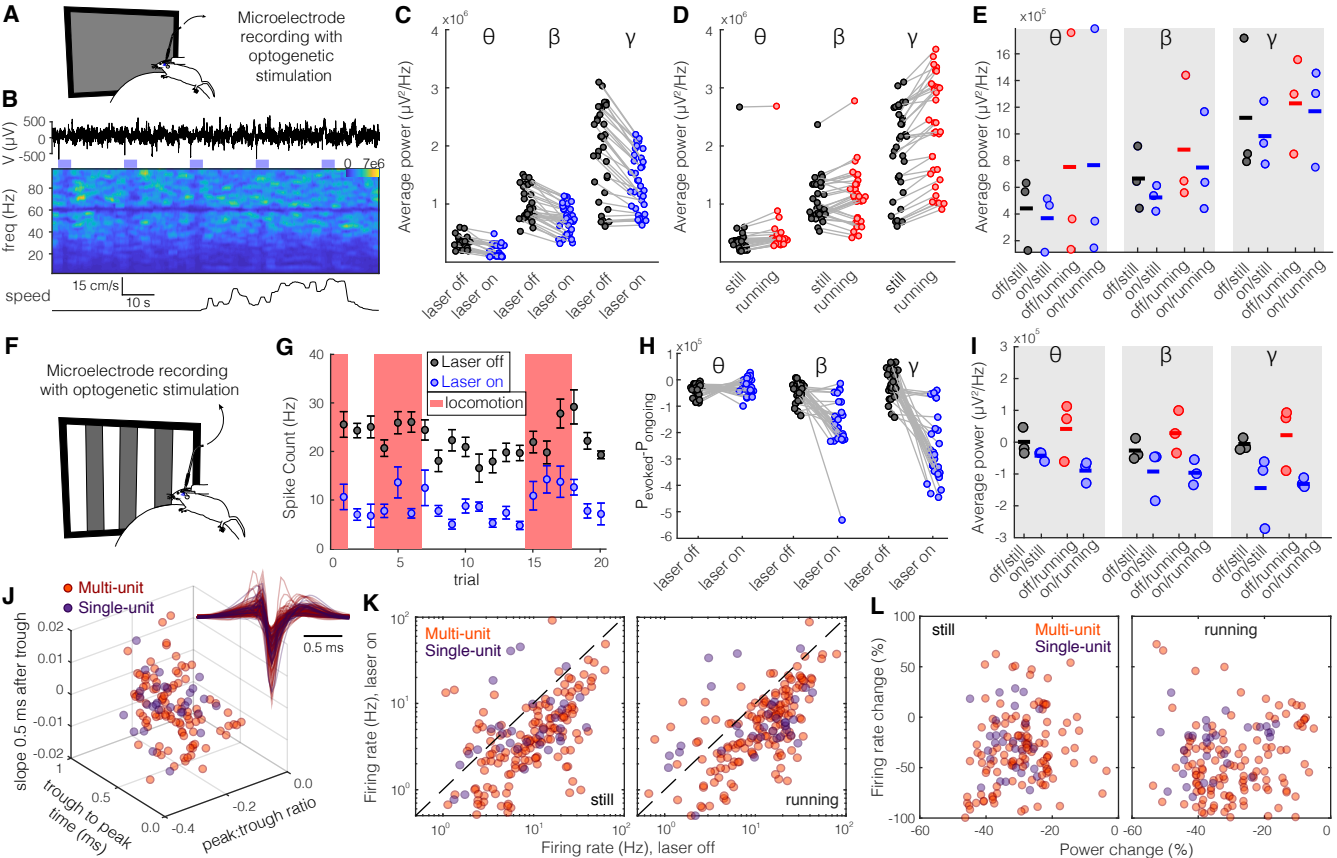

Supplement: supp [file elife-61437-supp-v1.zip]

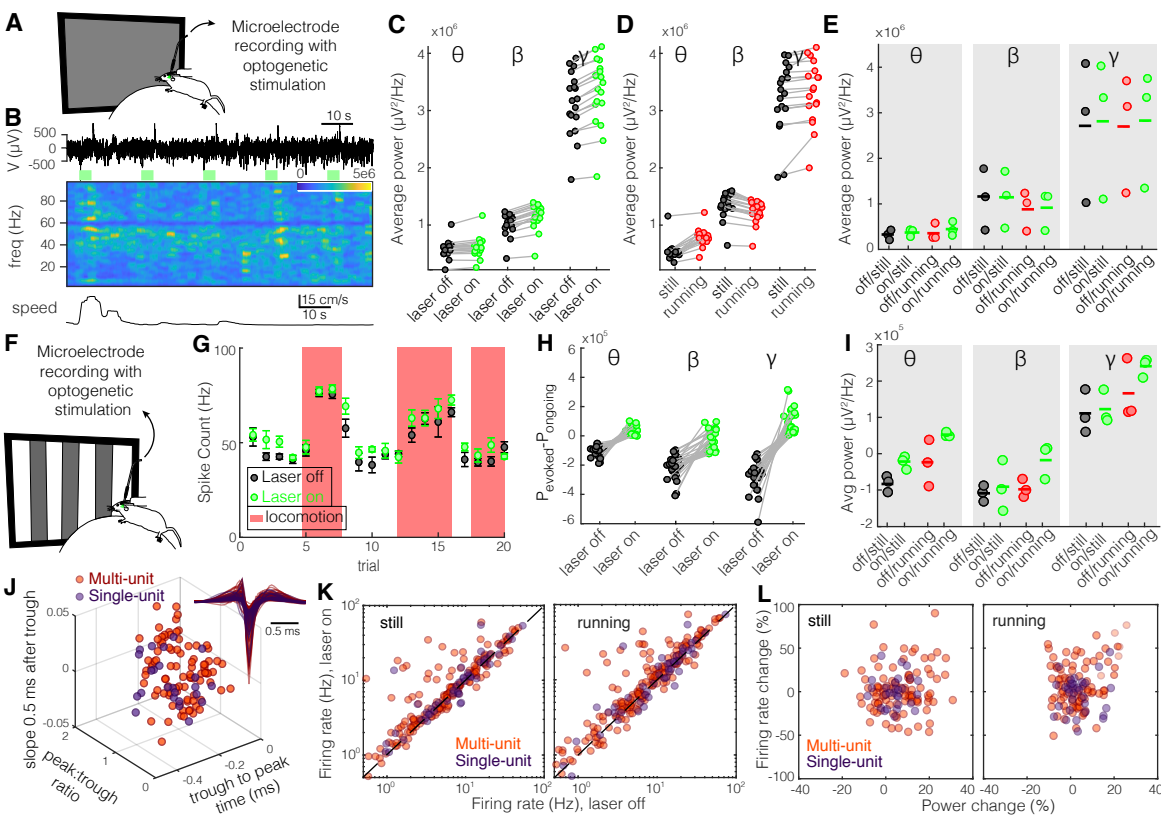

Supplement: supp [file elife-61437-supp-v1.zip]

Bregma -2.8 mm

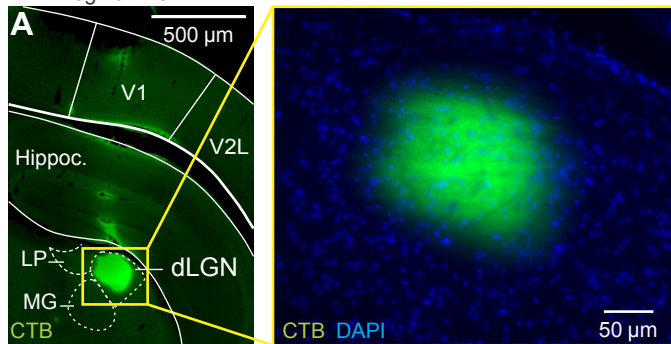

Bregma -1.8 mm

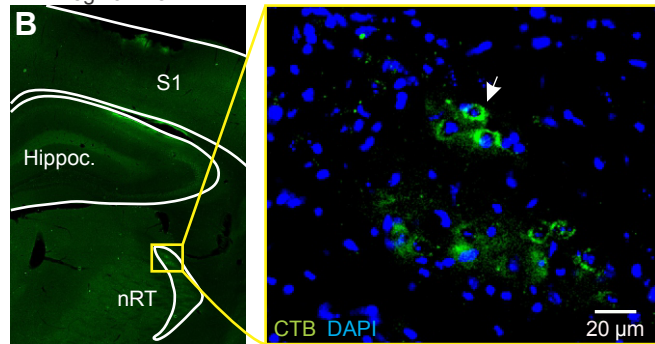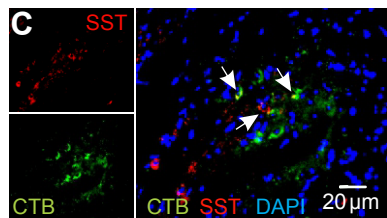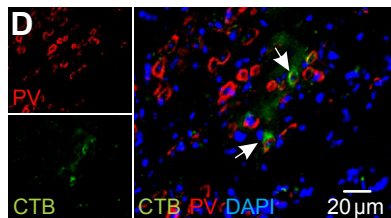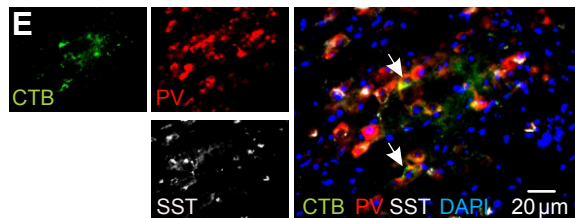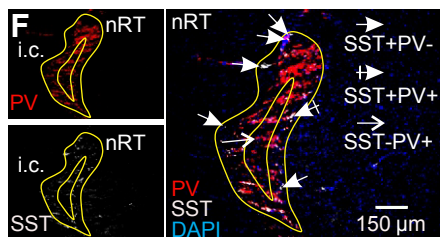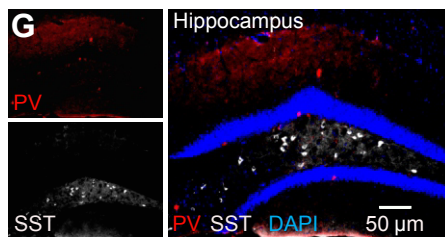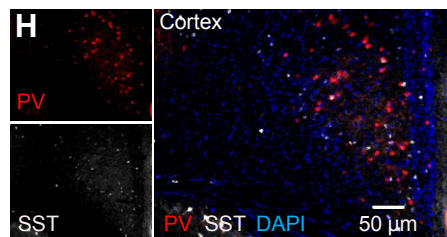

Supplement: supp [file elife-61437-supp-v1.zip]

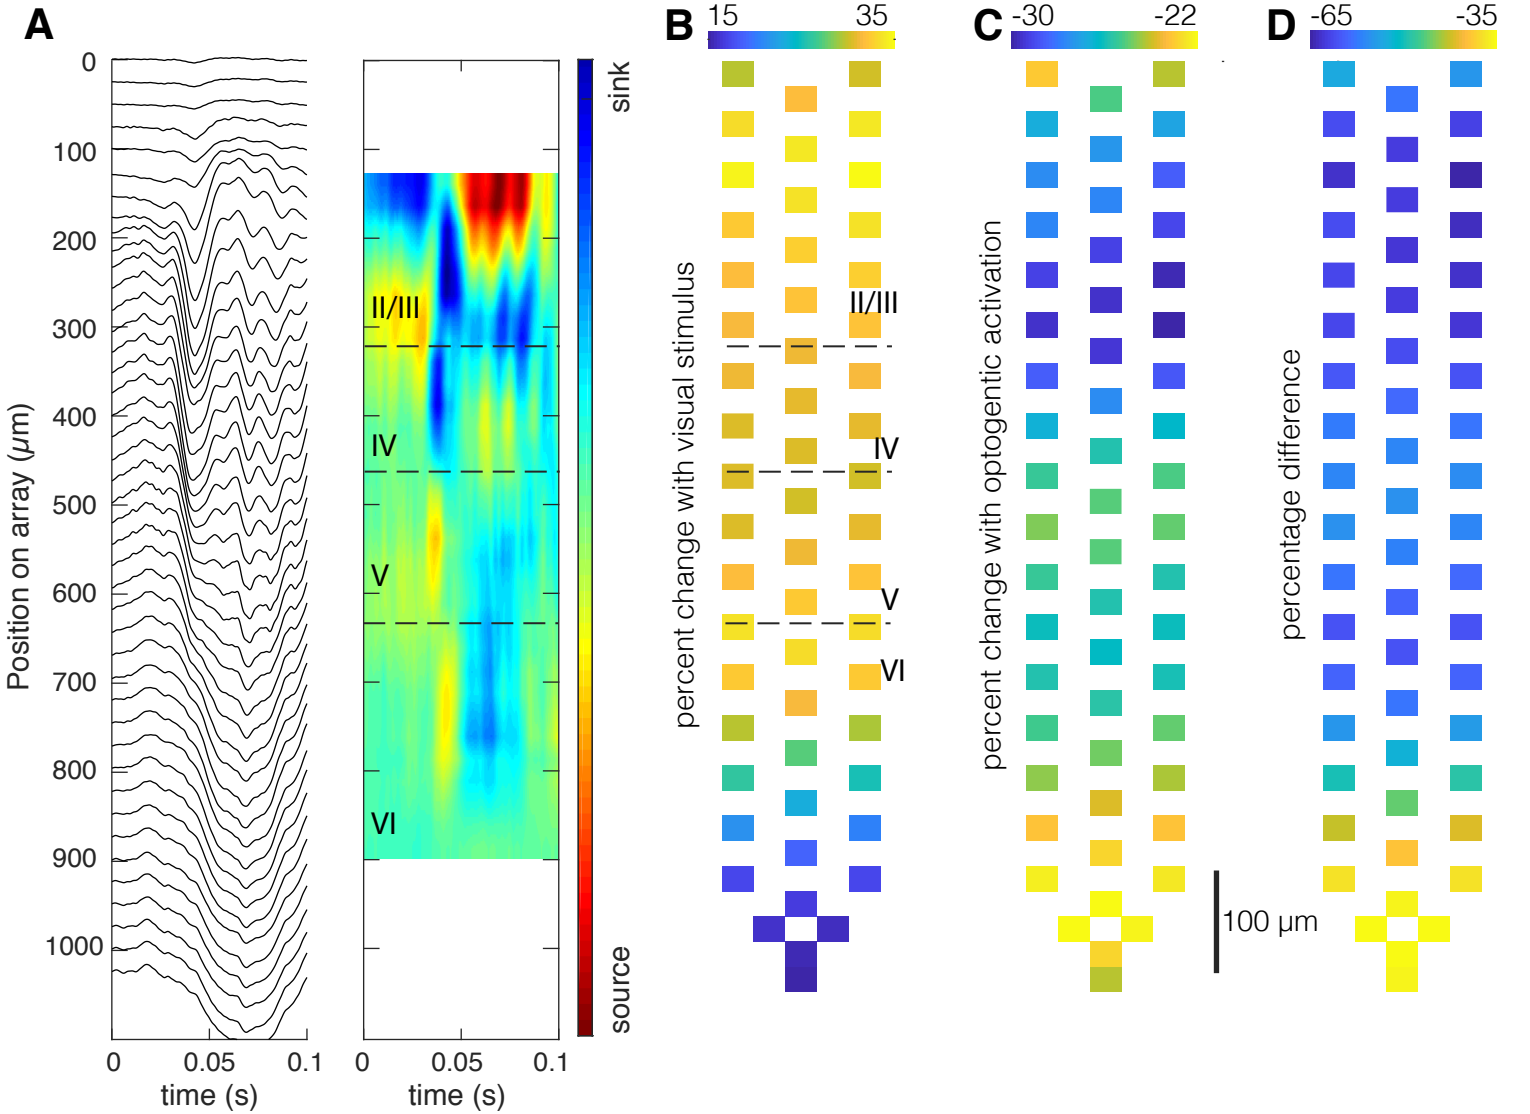

Supplement: supp [file elife-61437-supp-v1.zip]

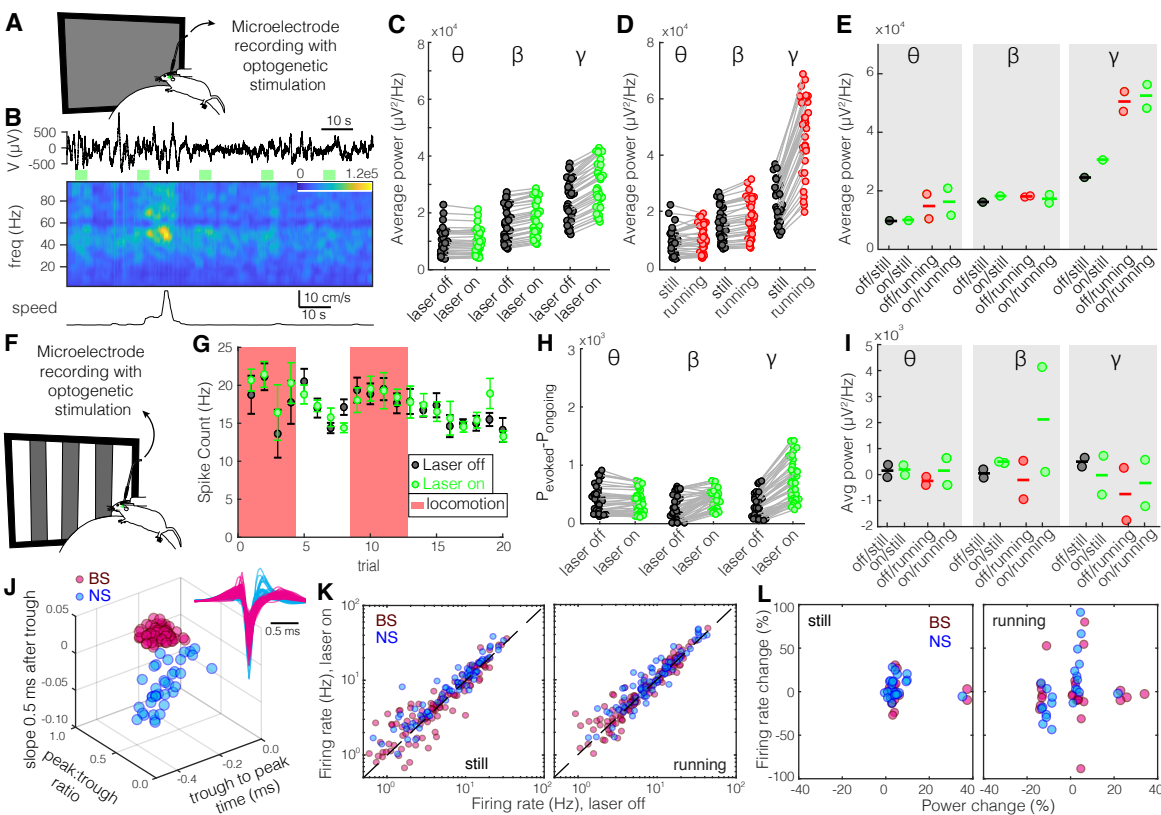

Supplement: supp [file elife-61437-supp-v1.zip]
